# Supplementary material for: Metal-free oxidative amidation of aldehydes with aminopyridines employing aqueous hydrogen peroxide
Source: Royal Society of Chemistry journal article supplement (doi:10.1039/c6ob01454b), 2016-01-01
Supplement: c6ob01454b1.pdf [file c6ob01454b1.pdf]

## Supporting information

### Metal-free Oxidative amidation of aldehydes with aminopyridines employing aqueous hydrogen peroxide

**E. Sankari Devi,<sup>a</sup> Anitha Alanthadka,<sup>a</sup> A. Tamilselvi,<sup>b</sup> Subbiah Nagarajan,<sup>a</sup> Vellaisamy Sridharan<sup>a</sup> and C. Uma Maheswari<sup>a\*</sup>**

<sup>a</sup> Organic Synthesis group, Department of Chemistry, School of Chemical and Biotechnology, SASTRA University, Thanjavur-613401, India.

Fax: (+91)-4362-264111 E-mail: [umamaheswaric@scbt.sastra.edu](mailto:umamaheswaric@scbt.sastra.edu); [uma.cchem@gmail.com](mailto:uma.cchem@gmail.com)

<sup>b</sup> Department of Chemistry, Thiagarajar College, Madurai-625009, India.

#### *Table of Contents*

|                                                                           |              |
|---------------------------------------------------------------------------|--------------|
| <b>1. General Information</b>                                             | <b>2</b>     |
| <b>2. Experimental section</b>                                            | <b>2</b>     |
| <b>3. Spectroscopic data for products</b>                                 | <b>3-9</b>   |
| <b>4. Copies of <sup>1</sup>H NMR and <sup>13</sup>C NMR for products</b> | <b>11-38</b> |
| <b>5. References</b>                                                      | <b>39</b>    |

## 1. General Information

All chemicals were purchased from Sigma-Aldrich, Alfa Aesar, Finar and Avra Synthesis, Pvt. Ltd. India and used as received. ACME silica gel (100–200 mesh) was used for column chromatography and thin-layer chromatography was performed on Merck-pre-coated silica gel 60-F<sub>254</sub> plates. All the other chemicals and solvents were obtained from commercial sources and purified using standard methods.

<sup>1</sup>H NMR spectra was recorded on Bruker 300 MHz spectrometer. <sup>13</sup>C NMR spectra were recorded on Bruker 75 MHz spectrometer. <sup>1</sup>H NMR chemical shifts are expressed in parts per million (δ) downfield from tetramethylsilane (with the CHCl<sub>3</sub> and DMSO peak around 7.26 ppm and 2.5 ppm used as standard respectively). <sup>13</sup>C NMR chemical shifts are expressed in parts per million (δ) downfield from tetramethylsilane (with the central peak of CHCl<sub>3</sub> and DMSO around 77.2 ppm and 39.5 ppm used as standard respectively). All <sup>13</sup>C spectra were measured with complete proton decoupling. NMR coupling constants (J) are reported in Hertz (Hz), and splitting patterns are indicated as follows: br, broad; s, singlet; d, doublet; dd, doublet of doublet; ddd, doublet of doublet of doublet; dt, doublet of triplet; t, triplet; q, quartet; m, multiplet.

## 2. Experimental section:

### (i) General Procedure for synthesis of substituted *N*-(pyridin-2-yl)benzamide

A mixture of benzaldehyde (0.106g, 1mmol), 2-aminopyridine (0.0941g, 1mmol) in water (2 mL) and Hydrogen peroxide (3 equiv.) was stirred at 80 °C for 4 h. Progress of the reaction was monitored by TLC. After the completion of the reaction, the mixture was extracted with ethyl acetate. The extract was washed with brine solution and dried over anhydrous Na<sub>2</sub>SO<sub>4</sub>. Removal of the solvent under vacuum afforded the crude product, which was purified by column chromatography using hexane/ethyl acetate mixture.

### 3. Spectroscopic data for the products:

#### 1. *N*-(pyridin-2-yl)benzamide (3a)

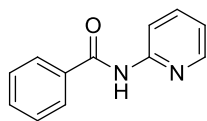

Isolated yield = 91%, 180 mg, white crystalline solid.  $^1\text{H}$  NMR (300 MHz,  $\text{CDCl}_3$ )  $\delta$  8.83 (s, 1H), 8.41 (dt,  $J = 8.4, 0.9$  Hz, 1H), 8.25 (m, 1H), 7.99 – 7.90 (m, 2H), 7.82 – 7.72 (m, 1H), 7.62 – 7.45 (m, 3H), 7.07 (m, 1H).  $^{13}\text{C}$  NMR (75 MHz,  $\text{CDCl}_3$ )  $\delta$  165.9, 151.7, 147.8, 138.5, 134.3, 132.2, 128.8, 127.3, 119.9, 114.3. Physical and spectral properties of this material were identical to those previously reported in literature.<sup>[1]</sup>

#### 2. 4-methoxy-*N*-(pyridin-2-yl)benzamide (3b)

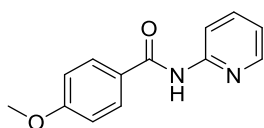

Isolated yield = 78%, 224 mg, white solid.  $^1\text{H}$  NMR (300 MHz,  $\text{CDCl}_3$ )  $\delta$  8.84 (s, 1H), 8.31 (d,  $J = 8.4$  Hz, 1H), 8.15 (s, 1H), 7.87 – 7.79 (m, 2H), 7.71 – 7.62 (m, 1H), 6.98–6.96 (m, 1H), 6.92 – 6.84 (m, 2H), 3.79 (s, 3H).  $^{13}\text{C}$  NMR (75 MHz,  $\text{CDCl}_3$ )  $\delta$  165.60, 162.72, 152.03, 147.67, 138.45, 129.37, 126.51, 119.59, 114.43, 113.90, 55.43. Physical and spectral properties of this material were identical to those previously reported in literature.<sup>[1]</sup>

#### 3. 4-methyl-*N*-(pyridin-2-yl)benzamide (3c)

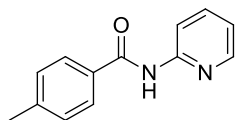

Isolated yield = 76%, 161 mg, white solid.  $^1\text{H}$  NMR (300 MHz,  $\text{CDCl}_3$ )  $\delta$  8.65 (s, 1H), 8.39 (m, 1H), 8.28 (m, 1H), 7.87 – 7.80 (m, 2H), 7.79 – 7.71 (m, 1H), 7.30 (d,  $J = 7.9$  Hz, 2H), 7.06 (m, 1H), 2.43 (s, 3H).  $^{13}\text{C}$  NMR (75 MHz,  $\text{CDCl}_3$ )  $\delta$  166.0, 151.9, 147.8, 142.7, 138.4, 131.5, 129.4, 127.4, 119.7, 114.4, 21.5. Physical and spectral properties of this material were identical to those previously reported in literature.<sup>[1]</sup>

#### 4. 4-isopropyl-*N*-(pyridin-2-yl)benzamide (3d)

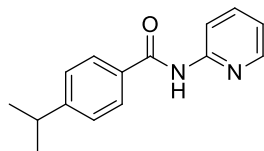

Isolated yield = 82%, 196 mg, white solid.  $^1\text{H}$  NMR (300 MHz,  $\text{CDCl}_3$ )  $\delta$  8.69 (s, 1H), 8.40 (d,  $J = 8.4$  Hz, 1H), 8.27 (dd,  $J = 4.9, 1.0$  Hz, 1H), 7.92 – 7.82 (m, 2H), 7.82 – 7.68 (m, 1H), 7.35 (d,  $J = 8.5$  Hz, 2H), 7.06 (m, 1H), 2.98 (m, 1H), 1.29 (d,  $J = 6.9$  Hz, 6H).  $^{13}\text{C}$  NMR (75 MHz,  $\text{CDCl}_3$ )  $\delta$  166.1, 153.5, 151.9, 147.8, 138.5, 127.5, 126.8, 119.7, 114.4, 34.1, 23.7. HRMS (ESI): calcd for  $\text{C}_{15}\text{H}_{16}\text{N}_2\text{O}$ ,  $m/z$  263.2901( $[\text{M}+\text{Na}]^+$ ); found,  $m/z$  263.1180. Physical and spectral properties of this material were identical to those previously reported in literature.<sup>[7]</sup>

#### 5. 4-fluoro-*N*-(pyridin-2-yl)benzamide (3e)

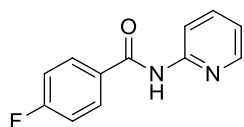

Isolated yield = 80%, 172 mg, white solid.  $^1\text{H}$  NMR (300 MHz,  $\text{CDCl}_3$ )  $\delta$  8.78 (s, 1H), 8.37 (dt,  $J = 8.4, 0.9$  Hz, 1H), 8.28 – 8.15 (m, 1H), 7.95 (m, 2H), 7.77 (m, 1H), 7.22 – 6.98 (m, 3H).  $^{13}\text{C}$  NMR (75 MHz,  $\text{CDCl}_3$ )  $\delta$  166.8, 165.1, 163.4, 151.8, 147.7, 138.6, 130.6, 130.5, 129.9, 129.8, 119.9, 116.0, 115.7, 114.5. HRMS (ESI): calcd for  $\text{C}_{12}\text{H}_9\text{FN}_2\text{O}$   $m/z$  239.2008 ( $[\text{M}+\text{Na}]^+$ ); found,  $m/z$  239.0441. Physical and spectral properties of this material were identical to those previously reported in literature.<sup>[7]</sup>

#### 6. 4-chloro-*N*-(pyridin-2-yl)benzamide (3f)

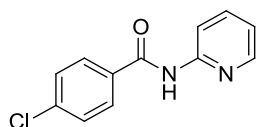

Isolated yield = 85%, 197 mg, white crystalline solid.  $^1\text{H}$  NMR (300 MHz,  $\text{CDCl}_3$ )  $\delta$  8.88 (s, 1H), 8.42 – 8.29 (m, 1H), 8.23 (d,  $J = 3.2$  Hz, 1H), 7.93 – 7.82 (m, 2H), 7.81 – 7.69 (m, 1H), 7.51 – 7.38 (m, 2H), 7.08 (dd,  $J = 6.4, 5.0$  Hz, 1H).  $^{13}\text{C}$  NMR (75 MHz,  $\text{CDCl}_3$ )  $\delta$  165.2, 151.7, 147.7, 138.6, 138.4, 132.8, 128.9, 120.0, 114.7. Physical and spectral properties of this material were identical to those previously reported in literature.<sup>[1]</sup>

#### 7. 4-bromo-*N*-(pyridin-2-yl)benzamide (3g)

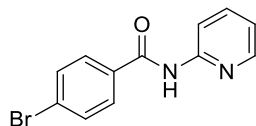

Isolated yield = 82%, 227 mg, white crystalline solid.  $^1\text{H}$  NMR (300 MHz,  $\text{CDCl}_3$ )  $\delta$  8.86 (s, 1H), 8.37 (dd,  $J = 8.4, 0.8$  Hz, 1H), 8.26 – 8.12 (m, 1H), 7.86 – 7.69 (m, 3H), 7.67 – 7.50 (m, 2H), 7.08 (m, 1H).  $^{13}\text{C}$  NMR (75 MHz,  $\text{CDCl}_3$ )  $\delta$  165.3, 151.7, 147.7, 138.6, 133.3, 131.9, 129.1, 127.0, 120.0, 114.6. Physical and spectral properties of this material were identical to those previously reported in literature.<sup>[1]</sup>

#### 8. 4-nitro-*N*-(pyridin-2-yl)benzamide (3h)

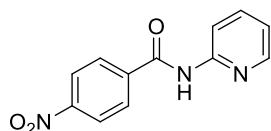

Isolated yield = 49%, 119 mg, white solid.  $^1\text{H}$  NMR (300 MHz,  $\text{CDCl}_3 + \text{DMSO}$ )  $\delta$  10.61 (s, 1H), 8.32 (m, 6H), 7.80 (d,  $J = 7.2$  Hz, 1H), 7.13 (s, 1H).  $^{13}\text{C}$  NMR (75 MHz,  $\text{CDCl}_3 + \text{DMSO}$ )  $\delta$  164.4, 151.8, 149.2, 147.8, 139.8, 138.0, 129.5, 123.2, 120.0, 114.8. Physical and spectral properties of this material were identical to those previously reported in literature.<sup>[2]</sup>

### 9. 4-cyano-*N*-(pyridin-2-yl)benzamide (3i)

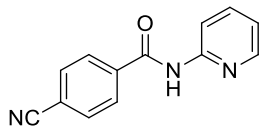

Isolated yield = 48%, 107 mg, white solid.  $^1\text{H}$  NMR (300 MHz,  $\text{CDCl}_3$ )  $\delta$  8.84 (s, 1H), 8.37 (dd,  $J = 8.4, 0.8$  Hz, 1H), 8.28 (m, 1H), 8.09 – 7.98 (m, 2H), 7.86 – 7.72 (m, 3H), 7.12 (m, 1H).  $^{13}\text{C}$  NMR (75 MHz,  $\text{CDCl}_3 + \text{DMSO}$ )  $\delta$  164.3, 151.4, 147.8, 138.4, 138.3, 132.4, 128.3, 120.3, 117.9, 115.4, 114.7. HRMS (ESI): calcd for  $\text{C}_{13}\text{H}_9\text{N}_3\text{O}$   $m/z$  224.238 ( $[\text{M}+\text{H}]^+$ ); found,  $m/z$  224.0668. Physical and spectral properties of this material were identical to those previously reported in literature.<sup>[7]</sup>

### 10. 2-nitro-*N*-(pyridin-2-yl)benzamide (3j)

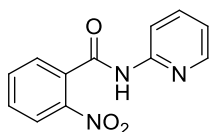

Isolated yield = 42%, 102 mg, white solid.  $^1\text{H}$  NMR (300 MHz,  $\text{CDCl}_3$ )  $\delta$  9.79 (s, 1H), 8.32 (d,  $J = 8.1$  Hz, 1H), 8.10 (dd,  $J = 8.0, 0.7$  Hz, 1H), 7.81 – 7.56 (m, 5H), 7.00 – 6.92 (m, 1H).  $^{13}\text{C}$  NMR (75 MHz,  $\text{CDCl}_3$ )  $\delta$  165.3, 151.6, 146.6, 146.2, 138.9, 134.0, 132.7, 130.7, 128.8, 124.5, 120.0, 115.4. HRMS (ESI): calcd for  $\text{C}_{12}\text{H}_9\text{N}_3\text{O}_3$   $m/z$  266.2079 ( $[\text{M}+\text{Na}]^+$ ); found,  $m/z$  266.0501.

### 11. 2-fluoro-*N*-(pyridin-2-yl)benzamide (3k)

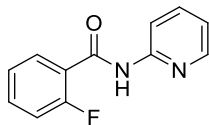

Isolated yield = 78%, 168 mg, white solid.  $^1\text{H}$  NMR (300 MHz,  $\text{CDCl}_3$ )  $\delta$  9.11 (d,  $J = 11.4$  Hz, 1H), 8.44 – 8.23 (m, 2H), 8.15 (m, 1H), 7.83 – 7.68 (m, 1H), 7.61 – 7.46 (m, 1H), 7.32 (m, 1H), 7.20 (m, 1H), 7.09 (m, 1H).  $^{13}\text{C}$  NMR (75 MHz,  $\text{CDCl}_3$ )  $\delta$  162.0, 161.8, 161.7, 158.7, 151.4, 148.0, 138.4, 134.1, 133.9, 131.9, 131.8, 125.0, 124.9, 121.5, 121.3, 120.1, 116.5, 116.2, 114.6. Physical and spectral properties of this material were identical to those previously reported in literature.<sup>[1]</sup>

### 12. 2-chloro-*N*-(pyridin-2-yl)benzamide (3l)

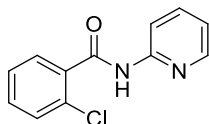

Isolated yield = 80%, 185 mg, white crystalline solid.  $^1\text{H}$  NMR (300 MHz,  $\text{CDCl}_3$ )  $\delta$  9.43 (s, 1H), 8.39 (d,  $J = 8.4$  Hz, 1H), 7.94 (m, 1H), 7.81 – 7.66 (m, 2H), 7.50 – 7.30 (m, 3H), 7.00 (m, 1H).  $^{13}\text{C}$  NMR (75 MHz,  $\text{CDCl}_3$ )  $\delta$  165.7, 151.7, 147.2, 138.6, 135.8, 131.5, 130.3, 129.5, 127.1, 119.9, 114.7. Physical and spectral properties of this material were identical to those previously reported in literature.<sup>[1]</sup>

### 13. 2-bromo-*N*-(pyridin-2-yl)benzamide (3m)

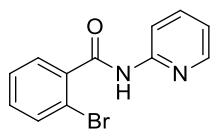

Isolated yield = 81%, 224 mg, white crystalline solid.  $^1\text{H}$  NMR (300 MHz,  $\text{CDCl}_3$ )  $\delta$  9.32 (s, 1H), 8.38 (d,  $J = 8.3$  Hz, 1H), 7.97 – 7.88 (m, 1H), 7.80 – 7.70 (m, 1H), 7.62 (m, 2H), 7.45 – 7.31 (m, 2H), 6.99 (m, 1H).  $^{13}\text{C}$  NMR (75 MHz,  $\text{CDCl}_3$ )  $\delta$  166.7, 151.7, 147.1, 138.6, 138.2, 133.4, 131.4, 129.1, 127.6, 119.9, 119.6, 114.8. Physical and spectral properties of this material were identical to those previously reported in literature.<sup>[1]</sup>

### 14. *N*-(pyridin-2-yl)thiophene-2-carboxamide(3n)

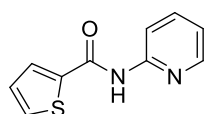

Isolated yield = 89%, 181 mg, white solid.  $^1\text{H}$  NMR (300 MHz,  $\text{CDCl}_3$ )  $\delta$  8.59 (s, 1H), 8.37 – 8.25 (m, 2H), 7.81 – 7.71 (m, 1H), 7.68 (dd,  $J = 3.8, 1.0$  Hz, 1H), 7.59 (dd,  $J = 5.0, 1.0$  Hz, 1H), 7.18 – 7.11 (m, 1H), 7.11 – 7.03 (m, 1H).  $^{13}\text{C}$  NMR (75 MHz,  $\text{CDCl}_3$ )  $\delta$  160.3, 151.5, 147.7, 139.1, 138.6, 131.6, 129.0, 127.9, 119.9, 114.6. Physical and spectral properties of this material were identical to those previously reported in literature.<sup>[2]</sup>

### 15. *N*-(pyridin-2-yl)furan-2-carboxamide (3o)

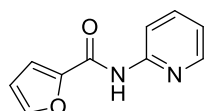

Isolated yield = 80%, 150 mg, white solid.  $^1\text{H}$  NMR (300 MHz,  $\text{CDCl}_3$ )  $\delta$  8.80 (s, 1H), 8.46 – 8.28 (m, 2H), 7.84 – 7.71 (m, 1H), 7.62 – 7.52 (m, 1H), 7.35 – 7.25 (m, 1H), 7.19 – 7.03 (m, 1H), 6.58 (dd,  $J = 3.5, 1.7$  Hz, 1H).  $^{13}\text{C}$  NMR (75 MHz,  $\text{CDCl}_3$ )  $\delta$  156.2, 151.1, 148.0, 147.3, 144.7, 138.4, 119.9, 115.9, 114.2, 112.6. Physical and spectral properties of this material were identical to those previously reported in literature.<sup>[1]</sup>

### 16. *N*-(pyridin-2-yl)picolinamide (3p)

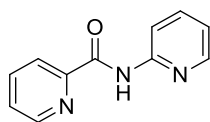

Isolated yield = 84%, 167 mg, white crystalline solid.  $^1\text{H}$  NMR (300 MHz,  $\text{CDCl}_3$ )  $\delta$  10.54 (s, 1H), 8.40 (d,  $J = 8.4$  Hz, 1H), 7.76 – 7.66 (m, 1H), 7.65 – 7.55 (m, 1H), 7.46 (s, 1H), 7.41 – 7.28 (m, 3H), 6.86 (dd,  $J = 6.5, 5.7$  Hz, 1H).  $^{13}\text{C}$  NMR (75 MHz,  $\text{CDCl}_3$ )  $\delta$  162.5, 151.1, 149.2, 148.2, 138.2, 137.5, 126.7, 122.4, 119.8, 113.9. Physical and spectral properties of this material were identical to those previously reported in literature.<sup>[3]</sup>

**17. N-(pyridin-2-yl)cyclohexanecarboxamide (3q)**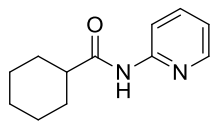

Isolated yield = 76%, 155 mg, white solid.  $^1\text{H}$  NMR (300 MHz,  $\text{CDCl}_3$ )  $\delta$  8.26 (m, 3H), 7.70 (m, 1H), 7.03 (m, 1H), 2.26 (tt,  $J$  = 11.7, 3.5 Hz, 1H), 1.96 (d,  $J$  = 13.7 Hz, 2H), 1.83 (dd,  $J$  = 9.3, 3.3 Hz, 2H), 1.74 – 1.65 (m, 1H), 1.54 (m, 2H), 1.37 – 1.20 (m, 3H).  $^{13}\text{C}$  NMR (75 MHz,  $\text{CDCl}_3$ )  $\delta$  175.2, 152.0, 147.4, 138.5, 119.5, 114.5, 46.2, 29.4, 25.5. HRMS (ESI): calcd for  $\text{C}_{12}\text{H}_{16}\text{N}_2\text{O}$   $m/z$  227.2566 ( $[\text{M}+\text{Na}]^+$ ); found,  $m/z$  227.114.

**18. N-(pyridin-2-yl)butyramide (3r)**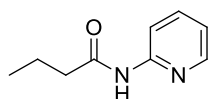

Isolated yield = 42%, 68 mg, colourless oil.  $^1\text{H}$  NMR (300 MHz,  $\text{CDCl}_3$ )  $\delta$  8.79 (s, 1H), 8.37 – 8.17 (m, 2H), 7.78 – 7.67 (m, 1H), 7.04 (m, 1H), 2.37 (t,  $J$  = 7.4 Hz, 2H), 1.88 – 1.67 (m, 2H), 0.99 (t,  $J$  = 7.4 Hz, 3H).  $^{13}\text{C}$  NMR (75 MHz,  $\text{CDCl}_3$ )  $\delta$  172.0, 151.8, 147.5, 138.5, 119.6, 114.4, 39.5, 18.8, 13.7. Physical and spectral properties of this material were identical to those previously reported in literature.<sup>[2]</sup>

**19. N-(3-methylpyridin-2-yl)benzamide (3s)**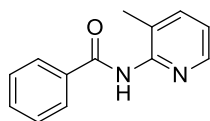

Isolated yield = 68%, 144 mg, whites solid.  $^1\text{H}$  NMR (300 MHz,  $\text{CDCl}_3$ )  $\delta$  8.77 (s, 1H), 8.30 (d,  $J$  = 8.5 Hz, 1H), 8.06 (s, 1H), 7.97 – 7.87 (m, 2H), 7.63 – 7.45 (m, 4H), 2.30 (s, 3H).  $^{13}\text{C}$  NMR (75 MHz,  $\text{CDCl}_3$ )  $\delta$  165.7, 149.4, 147.7, 139.1, 134.4, 132.1, 129.3, 128.8, 127.2, 113.7, 17.8. Physical and spectral properties of this material were identical to those previously reported in literature.<sup>[4]</sup>

**20. N-(4-methylpyridin-2-yl)benzamide (3t)**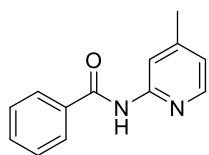

Isolated yield = 86%, 182 mg, white crystalline solid.  $^1\text{H}$  NMR (300 MHz,  $\text{CDCl}_3$ )  $\delta$  8.69 (s, 1H), 8.25 (d,  $J$  = 0.7 Hz, 1H), 8.12 (d,  $J$  = 5.1 Hz, 1H), 7.97 – 7.83 (m, 2H), 7.61 – 7.41 (m, 3H), 6.94 – 6.83 (m, 1H), 2.41 (s, 3H).  $^{13}\text{C}$  NMR (75 MHz,  $\text{CDCl}_3$ )  $\delta$  166.2, 151.9, 150.0, 147.3, 134.6, 132.0, 128.7, 127.4, 121.0, 115.0, 21.4. Physical and spectral properties of this material were identical to those previously reported in literature.<sup>[1]</sup>

**21. N-(5-methylpyridin-2-yl)benzamide (3u)**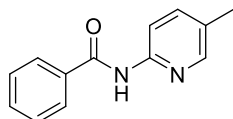

Isolated yield = 90%, 190 mg, white crystalline solid.  $^1\text{H}$  NMR (300 MHz,  $\text{CDCl}_3$ )  $\delta$  8.97 (s, 1H), 8.30 (d,  $J$  = 8.5 Hz, 1H), 8.05 – 7.88 (m, 3H), 7.62 – 7.45 (m, 4H), 2.28 (s,

3H).  $^{13}\text{C}$  NMR (75 MHz,  $\text{CDCl}_3$ )  $\delta$  166.2, 149.7, 147.7, 139.0, 134.7, 131.9, 129.1, 128.7, 127.4, 113.9, 17.8. Physical and spectral properties of this material were identical to those previously reported in literature.<sup>[1]</sup>

## 22. *N*-(6-methylpyridin-2-yl)benzamide (3v)

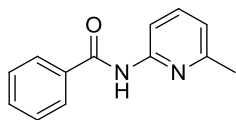

Isolated yield = 92%, 195 mg, white solid.  $^1\text{H}$  NMR (300 MHz,  $\text{CDCl}_3$ )  $\delta$  8.58 (s, 1H), 8.20 (d,  $J$  = 8.3 Hz, 1H), 7.98 – 7.90 (m, 2H), 7.71 – 7.62 (m, 1H), 7.61 – 7.43 (m, 3H), 6.94 (d,  $J$  = 7.5 Hz, 1H), 2.47 (s, 3H).  $^{13}\text{C}$  NMR (75 MHz,  $\text{CDCl}_3$ )

$\delta$  165.9, 156.9, 151.0, 138.7, 134.4, 132.1, 128.7, 127.3, 119.4, 111.1, 23.8. Physical and spectral properties of this material were identical to those previously reported in literature.<sup>[1]</sup>

## 23. *N*-(5-chloropyridin-2-yl)benzamide (3w)

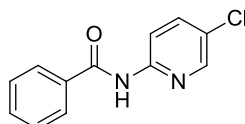

Isolated yield = 87%, 201 mg, white crystalline solid.  $^1\text{H}$  NMR (300 MHz,  $\text{CDCl}_3$ )  $\delta$  8.94 (s, 1H), 8.39 (d,  $J$  = 8.9 Hz, 1H), 8.11 (d,  $J$  = 2.5 Hz, 1H), 7.99 – 7.86 (m, 2H), 7.70 (dd,  $J$  = 8.9, 2.6 Hz, 1H), 7.65 – 7.44 (m, 3H).  $^{13}\text{C}$  NMR (75 MHz,

$\text{CDCl}_3$ )  $\delta$  166.1, 150.1, 146.4, 138.1, 134.1, 132.4, 128.8, 127.4, 126.7, 115.1. Physical and spectral properties of this material were identical to those previously reported in literature.<sup>[2]</sup>

## 24. *N*-(5-bromopyridin-2-yl)benzamide (3x)

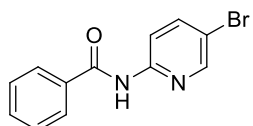

Isolated yield = 93%, 257 mg, white crystalline solid.  $^1\text{H}$  NMR (300 MHz,  $\text{CDCl}_3$ )  $\delta$  8.64 (s, 1H), 8.35 (dd,  $J$  = 9.8, 1.1 Hz, 2H), 7.93 – 7.83 (m, 3H), 7.63 – 7.56 (m, 1H), 7.54 – 7.48 (m, 2H).  $^{13}\text{C}$  NMR (75 MHz,  $\text{CDCl}_3$ )  $\delta$  166.0, 150.4, 148.7,

140.9, 134.1, 132.4, 128.8, 127.3, 115.5, 114.7. Physical and spectral properties of this material were identical to those previously reported in literature.<sup>[5]</sup>

## 25. *N*-(5-nitropyridin-2-yl)benzamide (3y)

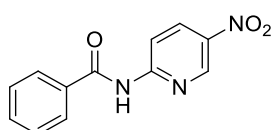

Isolated yield = 55%, 133 mg, white solid.  $^1\text{H}$  NMR (300 MHz,  $\text{CDCl}_3$ )  $\delta$  9.16 (dd,  $J$  = 2.5, 0.7 Hz, 1H), 8.97 (s, 1H), 8.62 – 8.50 (m, 2H), 7.99 – 7.88 (m, 2H), 7.63 (dd,  $J$  = 5.0, 3.6 Hz, 1H), 7.58 – 7.48 (m, 2H).  $^{13}\text{C}$  NMR (75 MHz,

$\text{CDCl}_3 + \text{DMSO}$ )  $\delta$  164.3, 151.4, 147.8, 138.4, 138.3, 132.4, 128.3, 120.3, 117.9, 115.4, 114.7. Physical and spectral properties of this material were identical to those previously reported in literature.<sup>[5]</sup>



## 26. *N*-(3,5-dichloropyridin-2-yl)benzamide (3z)

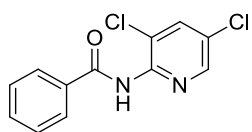

Isolated yield = 82%, 218 mg, white crystalline solid.  $^1\text{H}$  NMR (300 MHz,  $\text{CDCl}_3$ )  $\delta$  8.39 (d,  $J = 2.3$  Hz, 2H), 7.97 – 7.89 (m, 2H), 7.80 (d,  $J = 2.3$  Hz, 1H), 7.60 (m, 1H), 7.56 – 7.46 (m, 2H).  $^{13}\text{C}$  NMR (75 MHz,  $\text{CDCl}_3$ )  $\delta$  164.9, 146.3, 145.6, 137.6, 133.7, 132.6, 128.9, 128.1, 127.6, 123.3. HRMS (ESI): calcd for  $\text{C}_{12}\text{H}_8\text{Cl}_2\text{N}_2\text{O}$   $m/z$  289.1323 ( $[\text{M}+\text{Na}]^+$ ); found,  $m/z$  288.9961.

## 27. *N*-(pyridin-3-yl)benzamide (3aa)

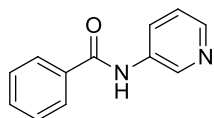

Isolated yield = 78%, 154 mg, white crystalline solid.  $^1\text{H}$  NMR (300 MHz,  $\text{CDCl}_3$ )  $\delta$  8.67 (d,  $J = 2.5$  Hz, 1H), 8.57 – 8.23 (m, 3H), 8.05 – 7.85 (m, 2H), 7.68 – 7.44 (m, 3H), 7.31 (dd,  $J = 8.3$ , 4.8 Hz, 1H).  $^{13}\text{C}$  NMR (75 MHz,  $\text{CDCl}_3$ )  $\delta$  167.1, 145.0, 141.9, 135.5, 134.2, 132.1, 128.6, 128.3, 127.4, 123.8. Physical and spectral properties of this material were identical to those previously reported in literature.<sup>[6]</sup>

## 28. *N*-(pyridin-4-yl)benzamide (3ab)

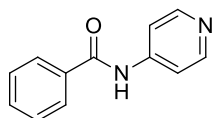

Isolated yield = 79%, 156 mg, white crystalline solid.  $^1\text{H}$  NMR (300 MHz,  $\text{CDCl}_3$ )  $\delta$  8.56 (d,  $J = 6.2$  Hz, 2H), 8.01 (s, 1H), 7.92 – 7.85 (m, 2H), 7.62 (dd,  $J = 5.0$ , 1.6 Hz, 3H), 7.53 (d,  $J = 8.0$  Hz, 2H).  $^{13}\text{C}$  NMR (75 MHz,  $\text{CDCl}_3+\text{DMSO}$ )  $\delta$  165.9, 149.1, 145.2, 133.6, 130.8, 127.2, 126.8, 113.2. Physical and spectral properties of this material were identical to those previously reported in literature.<sup>[6]</sup>

## 29. *N*-(pyrazin-2-yl)benzamide (3ac)

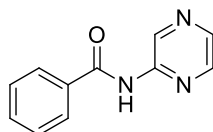

Isolated yield = 62%, 123 mg, white crystalline solid.  $^1\text{H}$  NMR (300 MHz,  $\text{CDCl}_3$ )  $\delta$  9.73 (d,  $J = 1.5$  Hz, 1H), 8.58 (s, 1H), 8.39 (d,  $J = 2.6$  Hz, 1H), 8.27 (dd,  $J = 2.5$ , 1.6 Hz, 1H), 7.99 – 7.91 (m, 2H), 7.65 – 7.58 (m, 1H), 7.57 – 7.50 (m, 2H).  $^{13}\text{C}$  NMR (75 MHz,  $\text{CDCl}_3$ )  $\delta$  165.6, 148.4, 142.1, 140.4, 137.3, 133.4, 132.7, 129.0, 127.4. Physical and spectral properties of this material were identical to those previously reported in literature.<sup>[2]</sup>

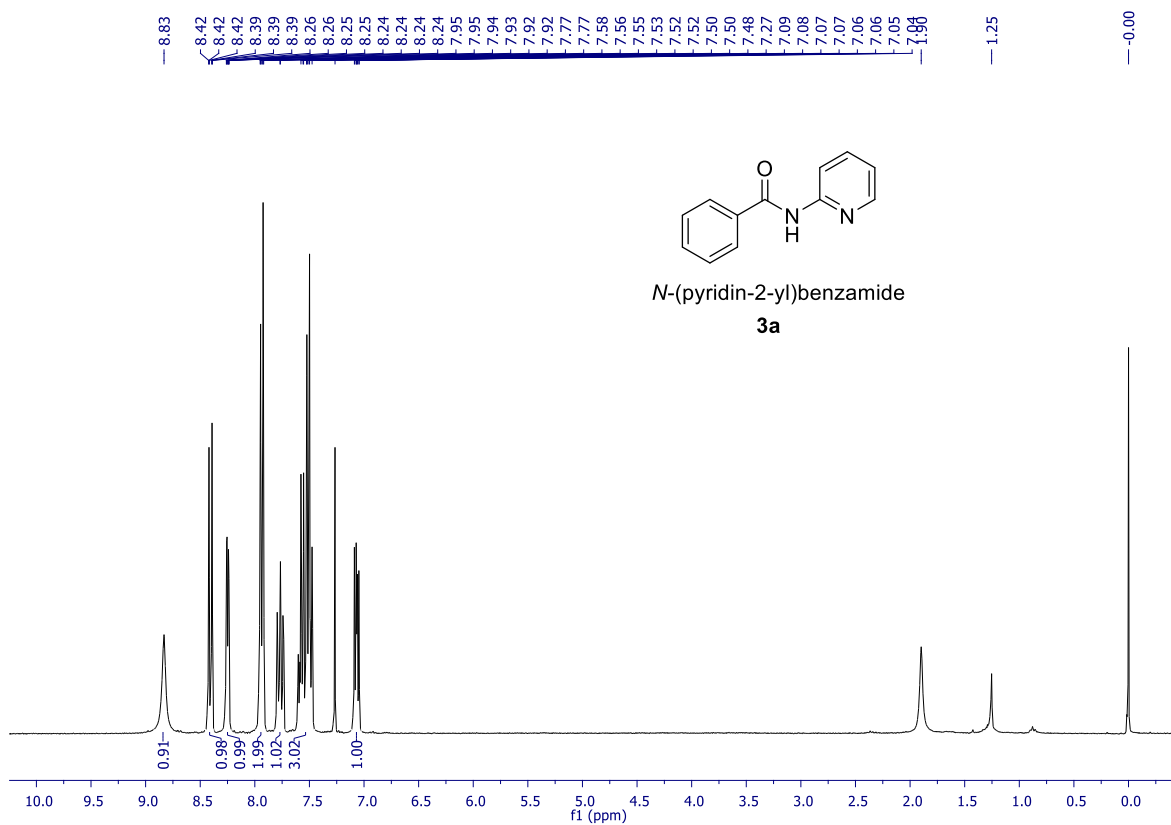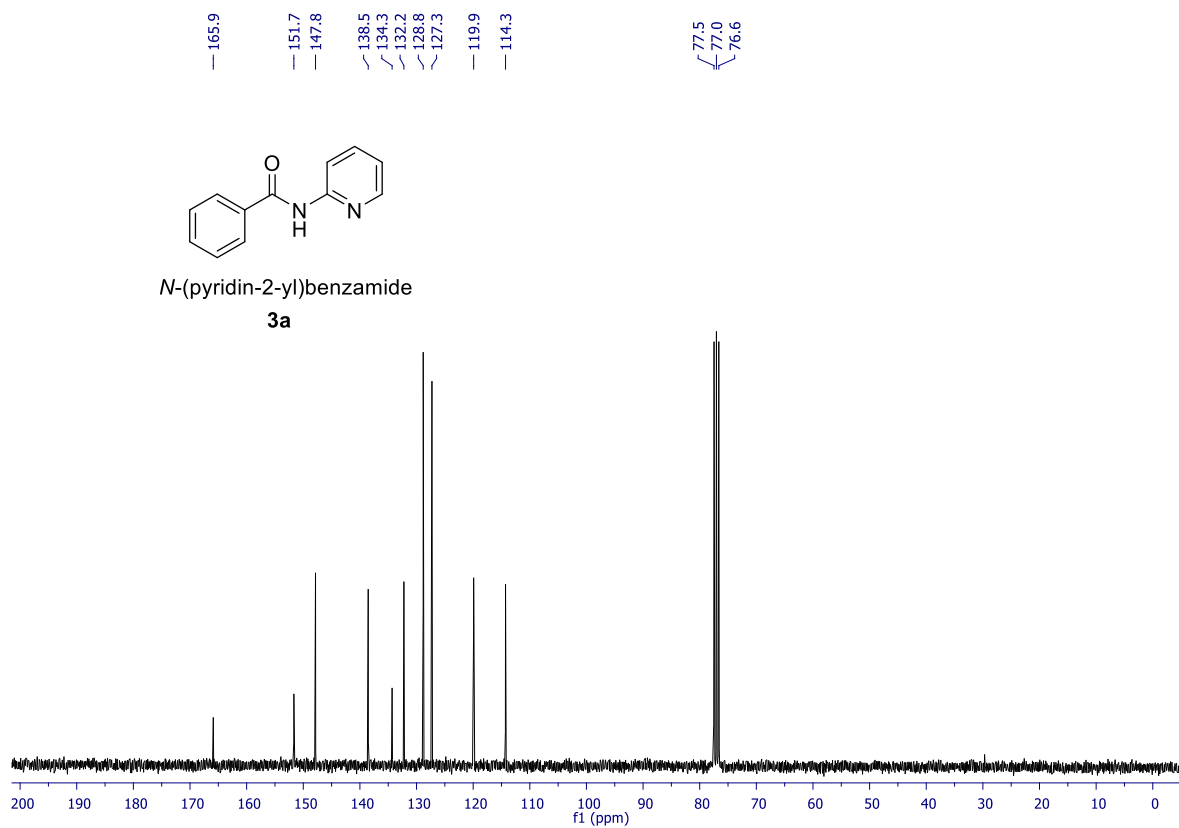

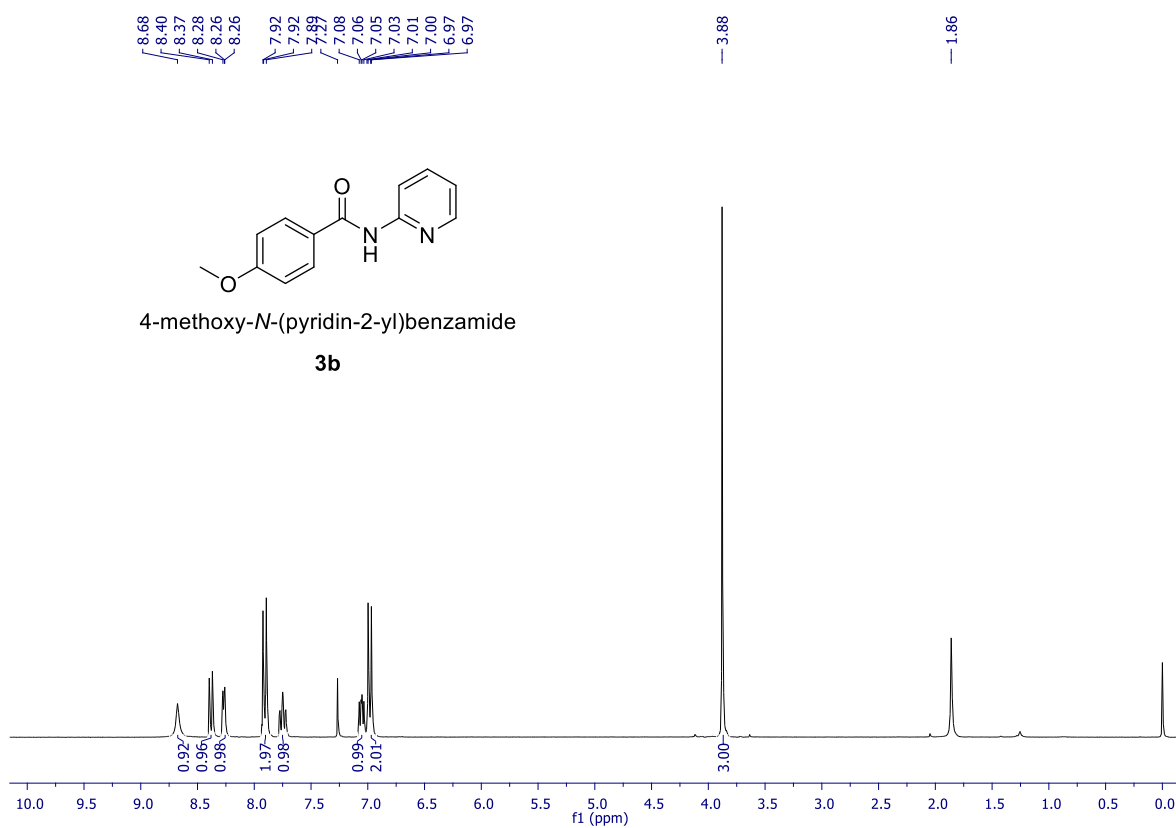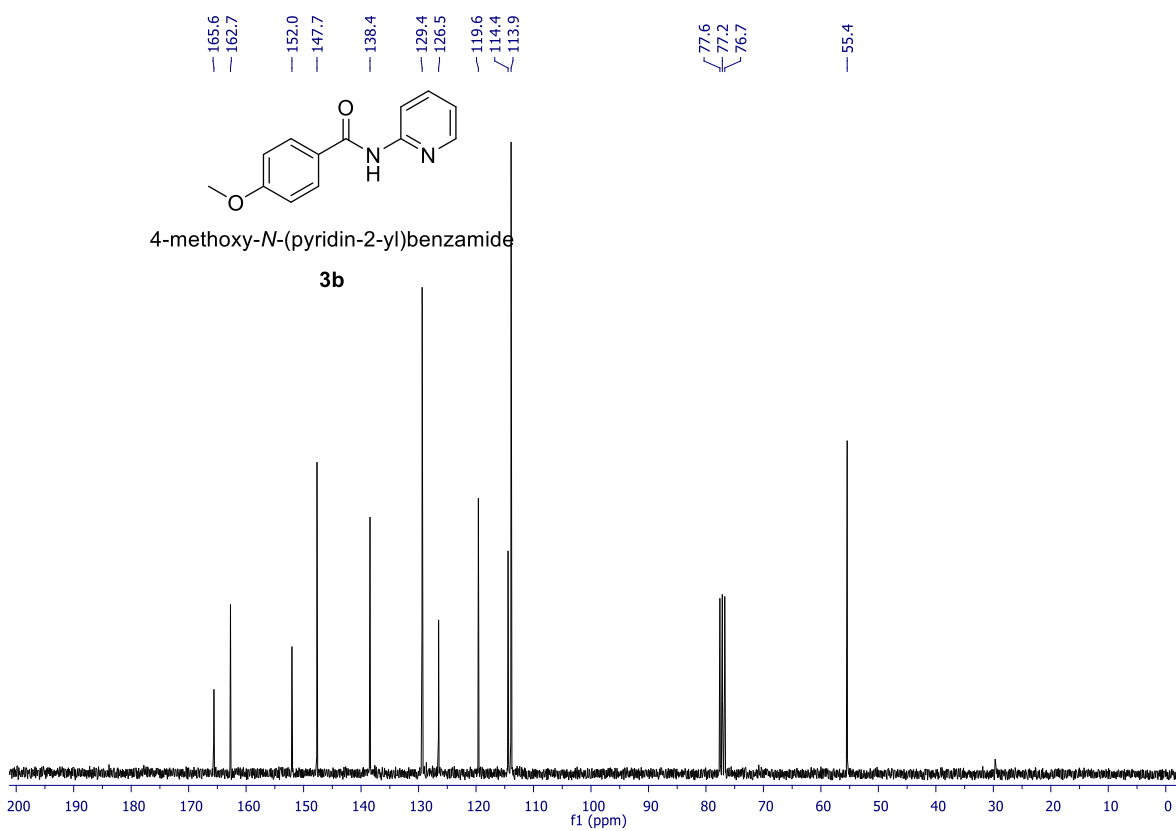

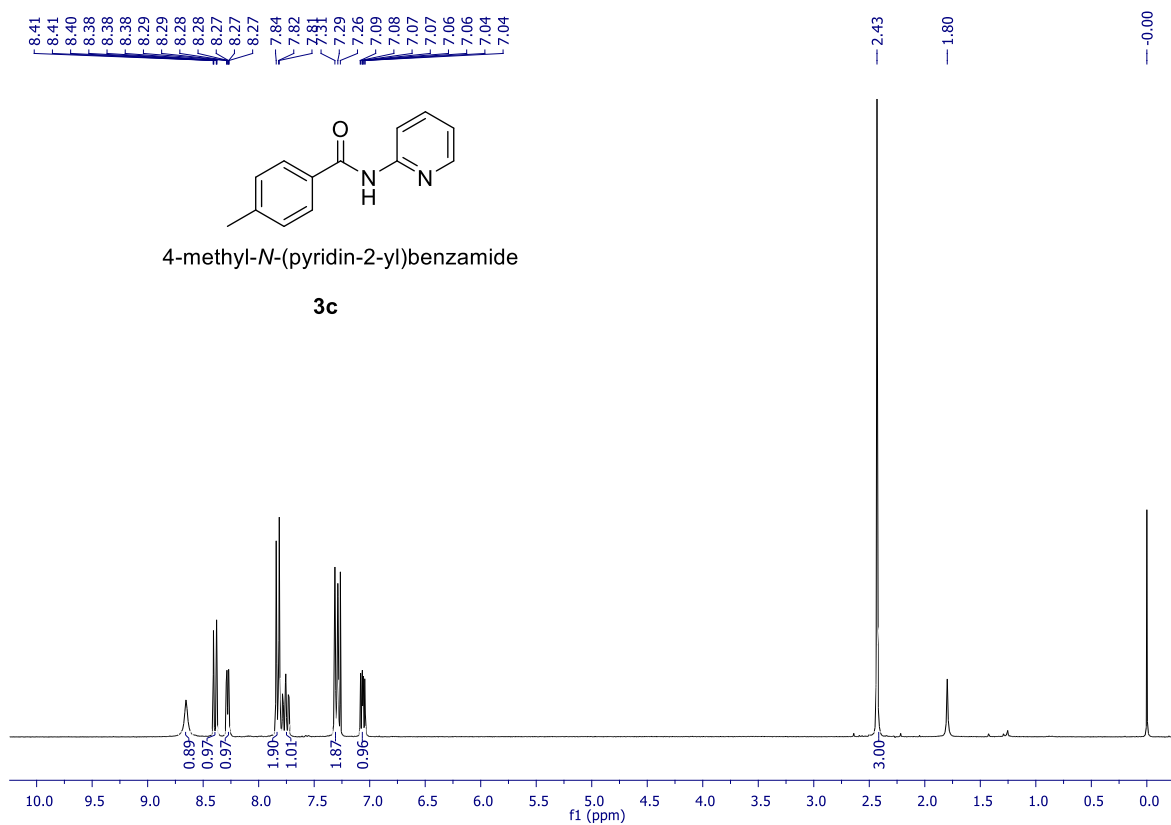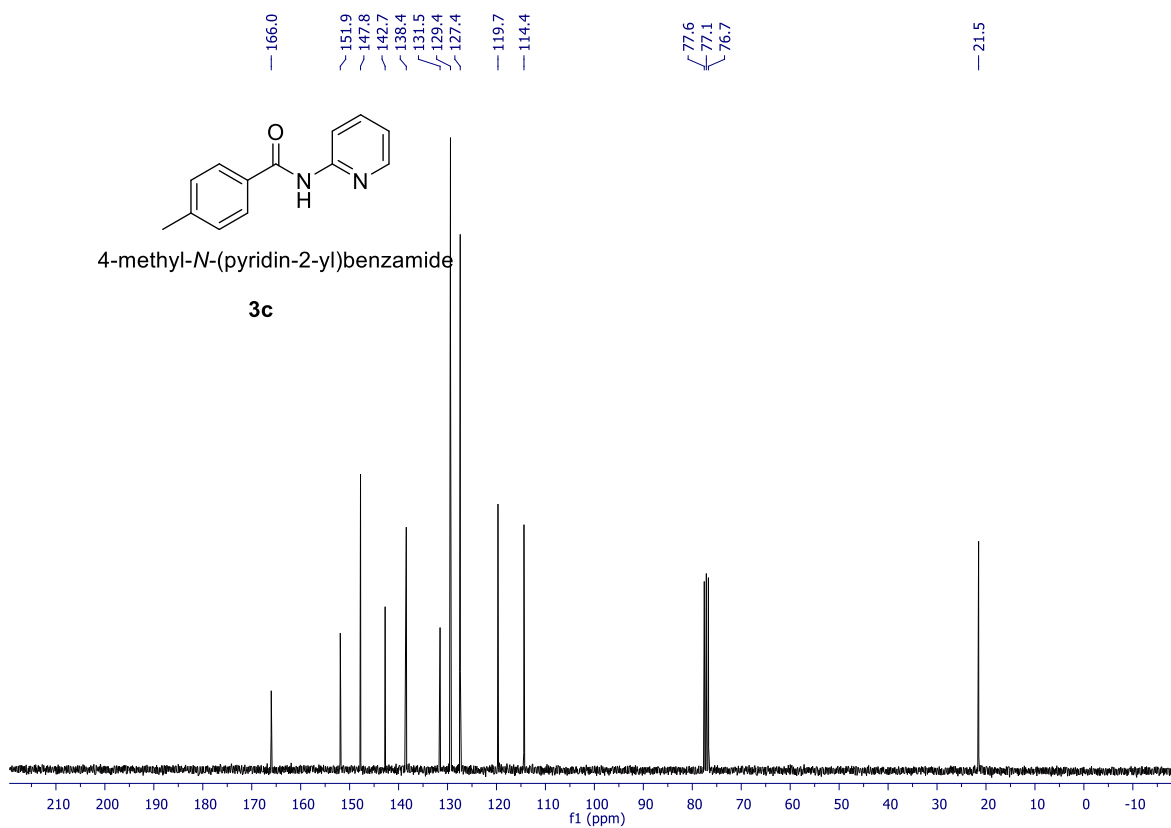

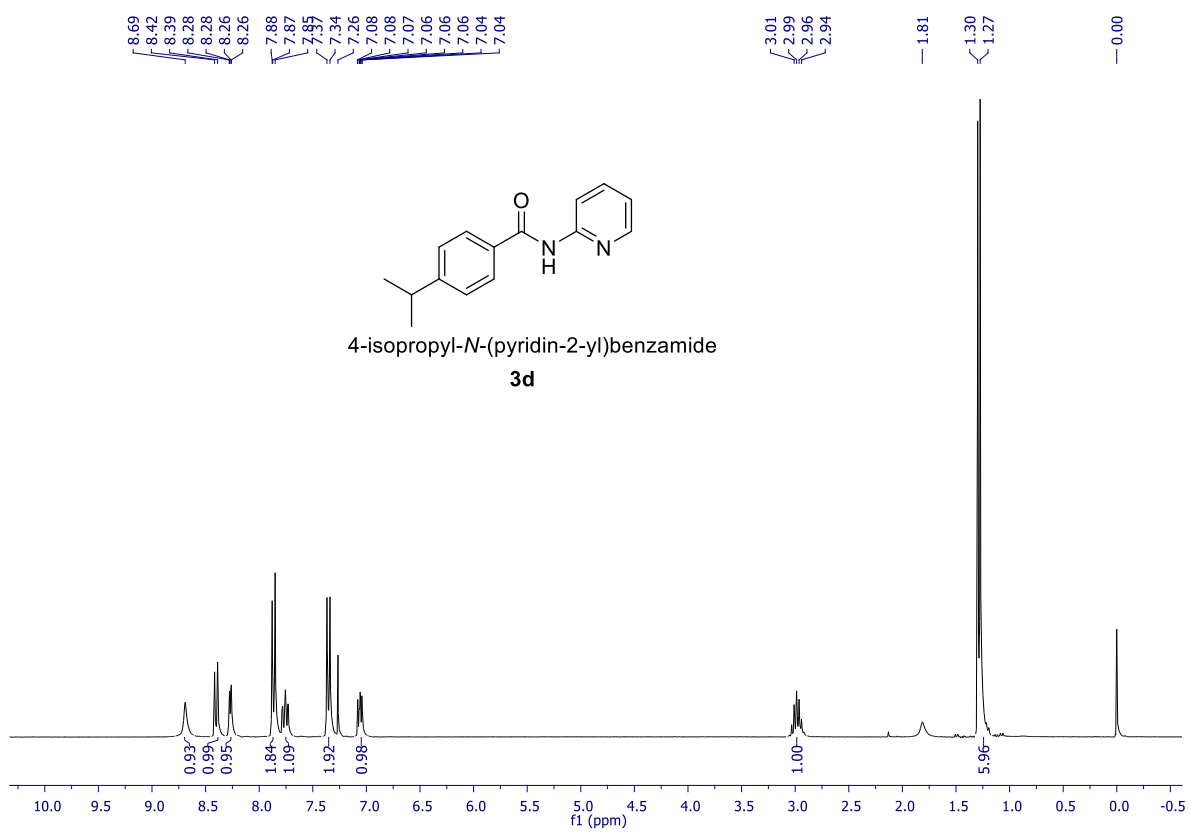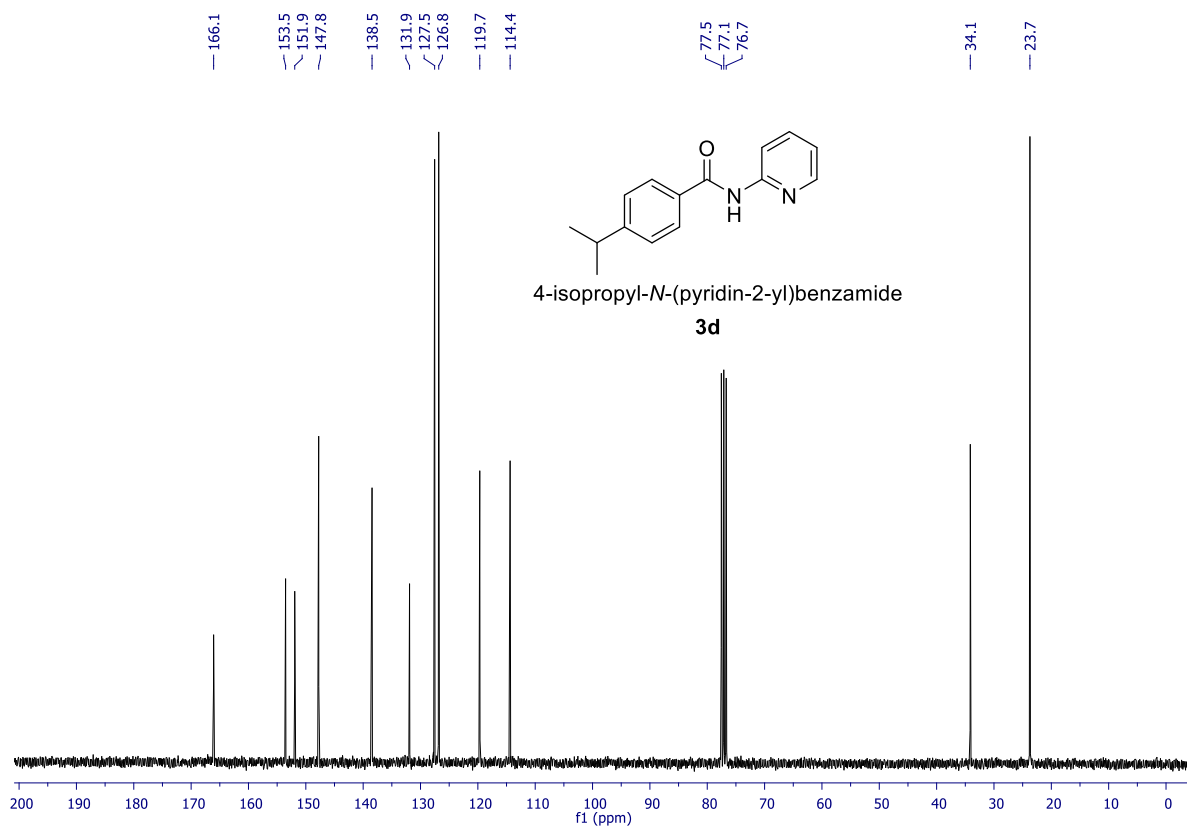

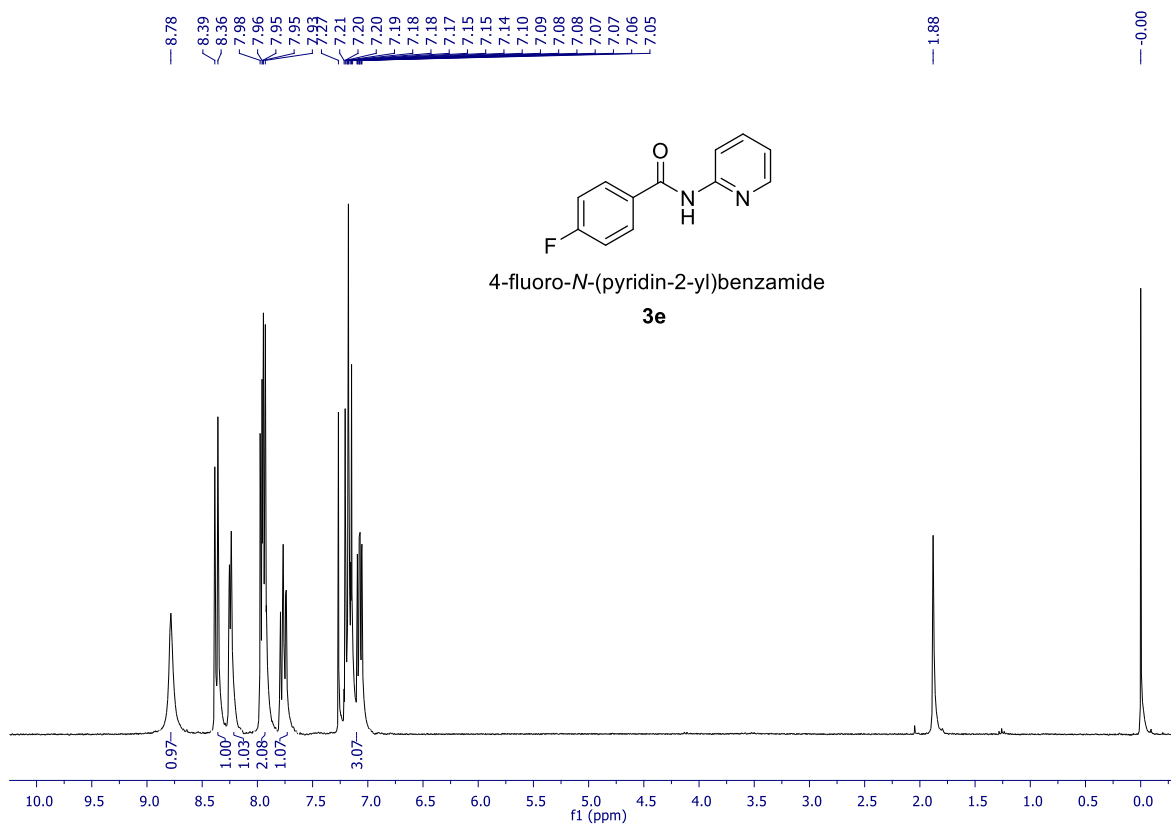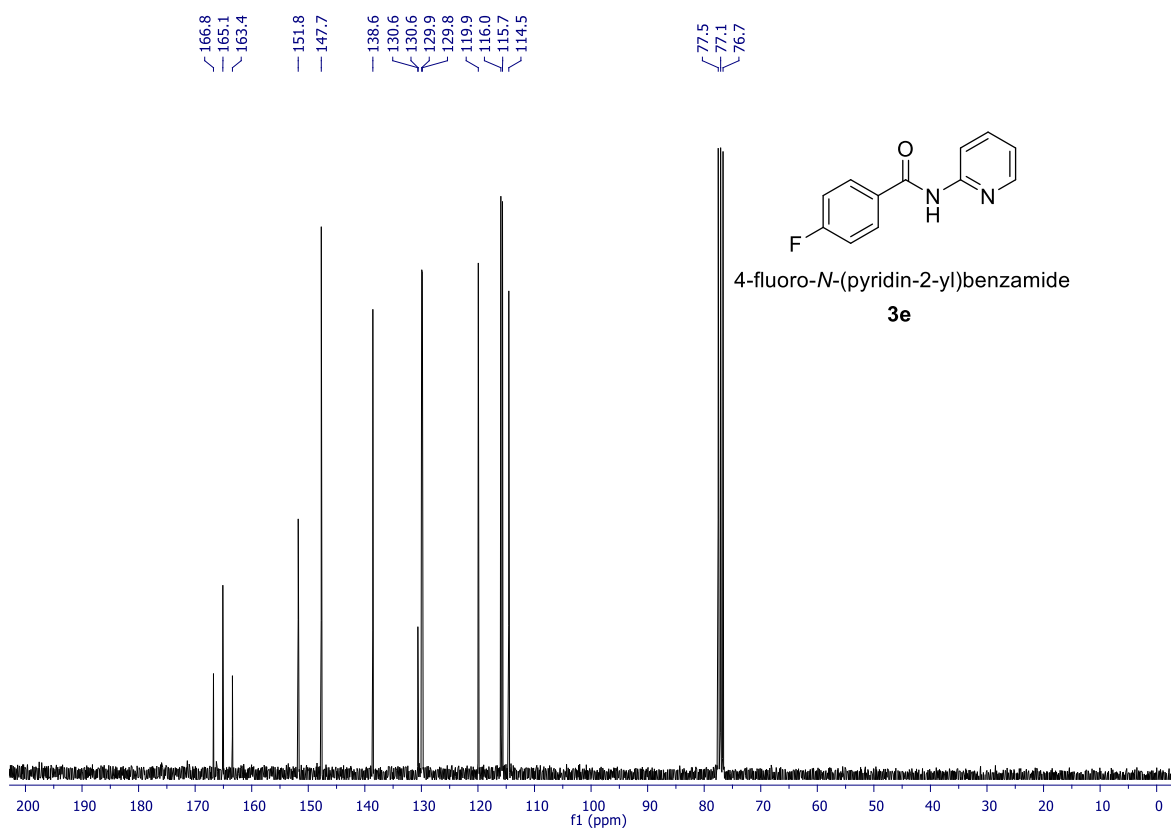



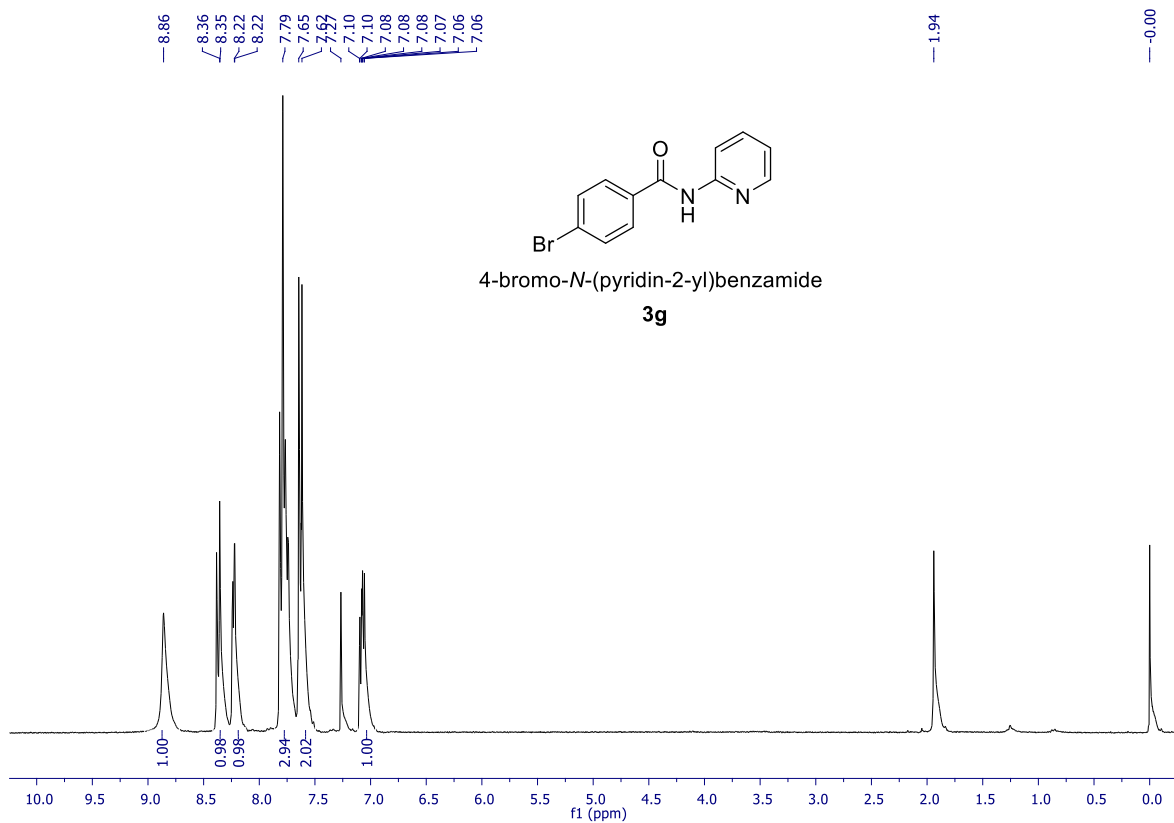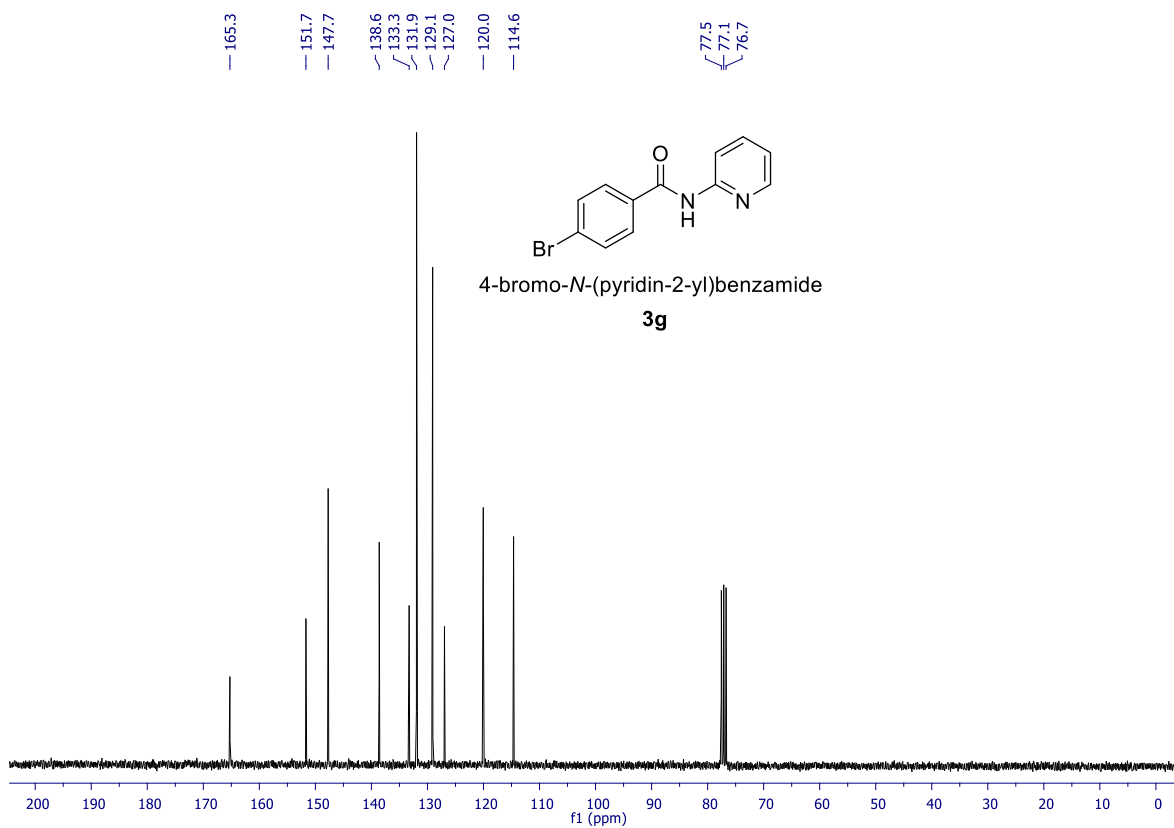



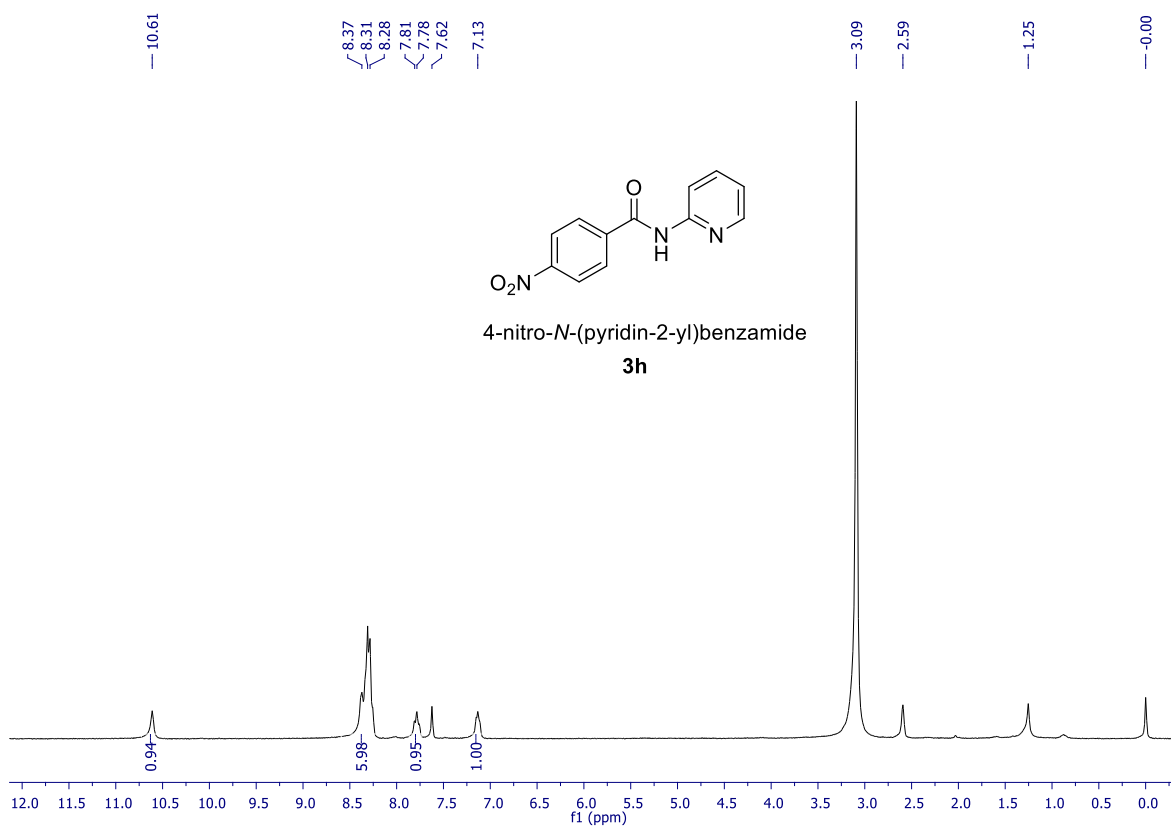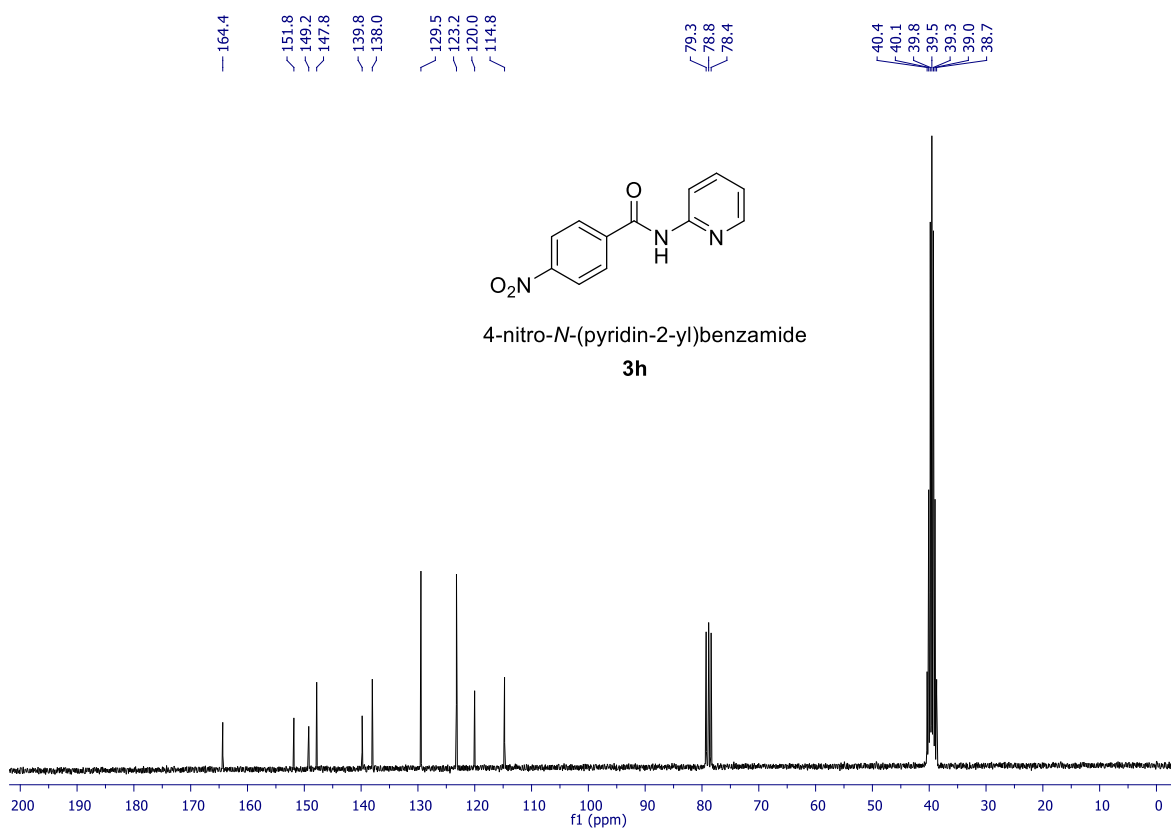

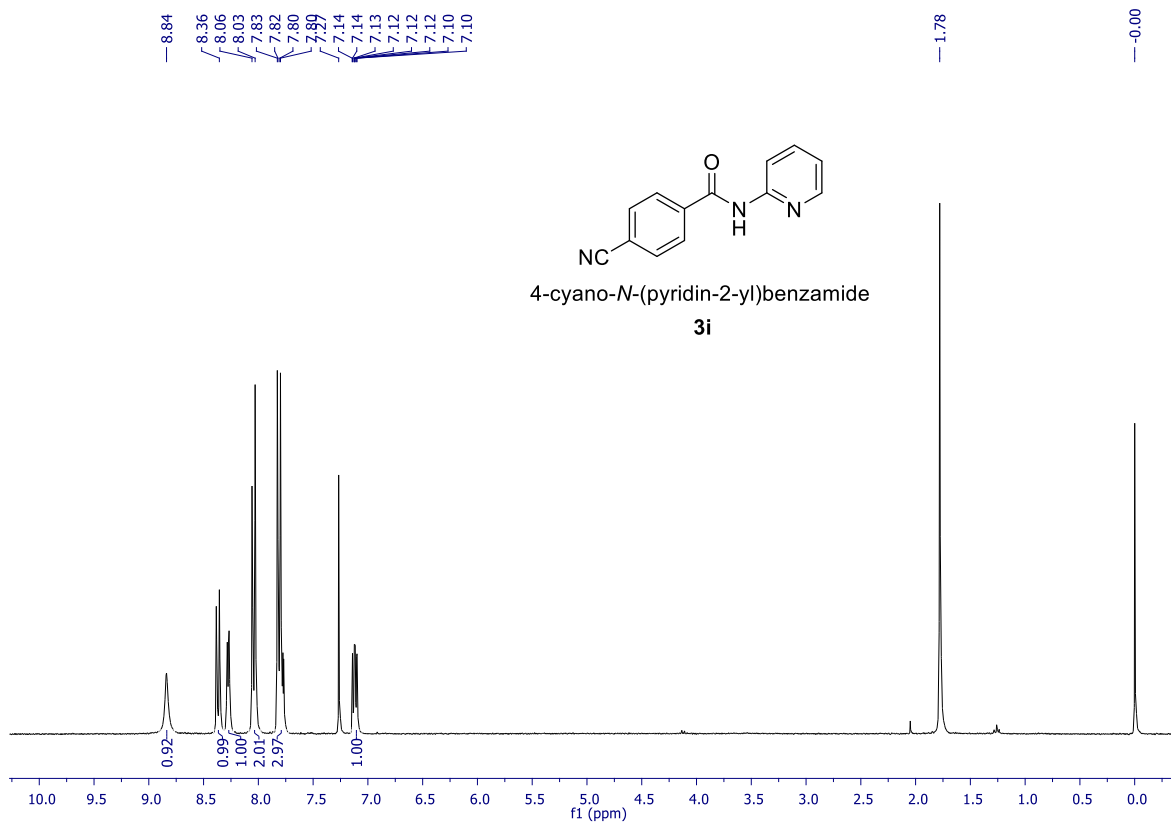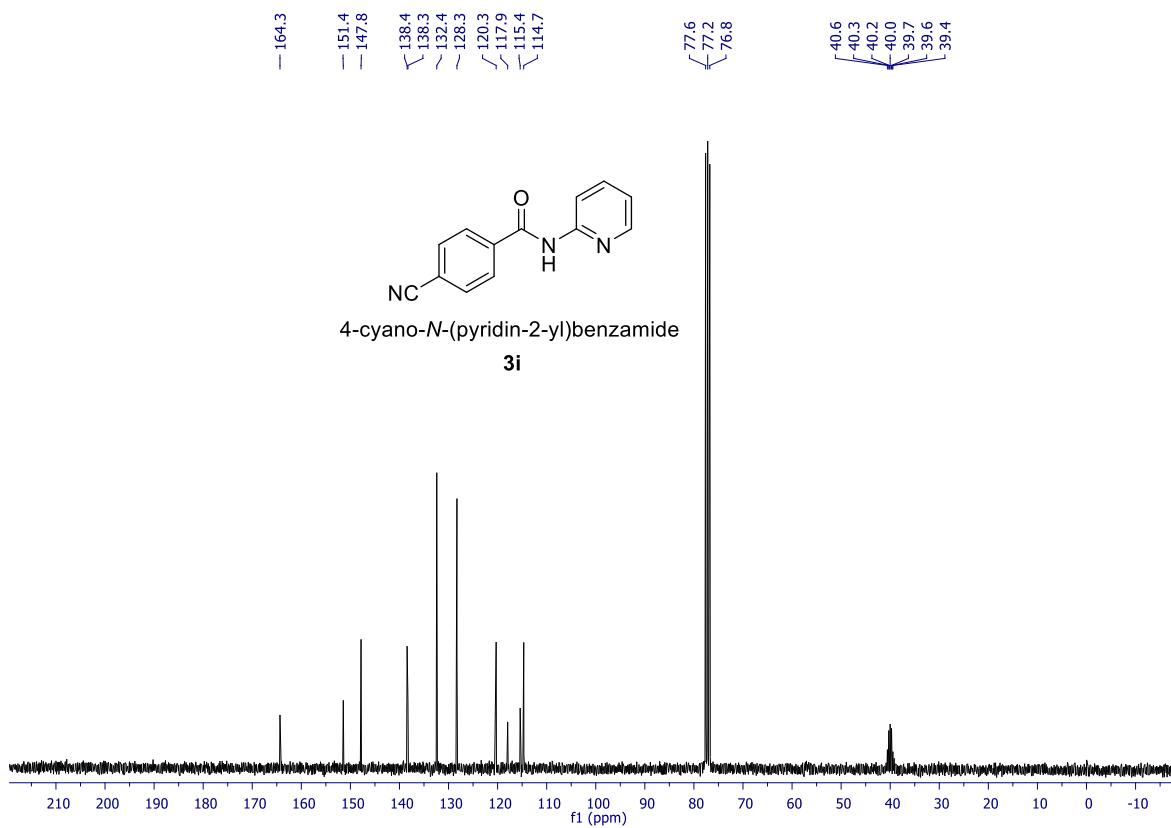

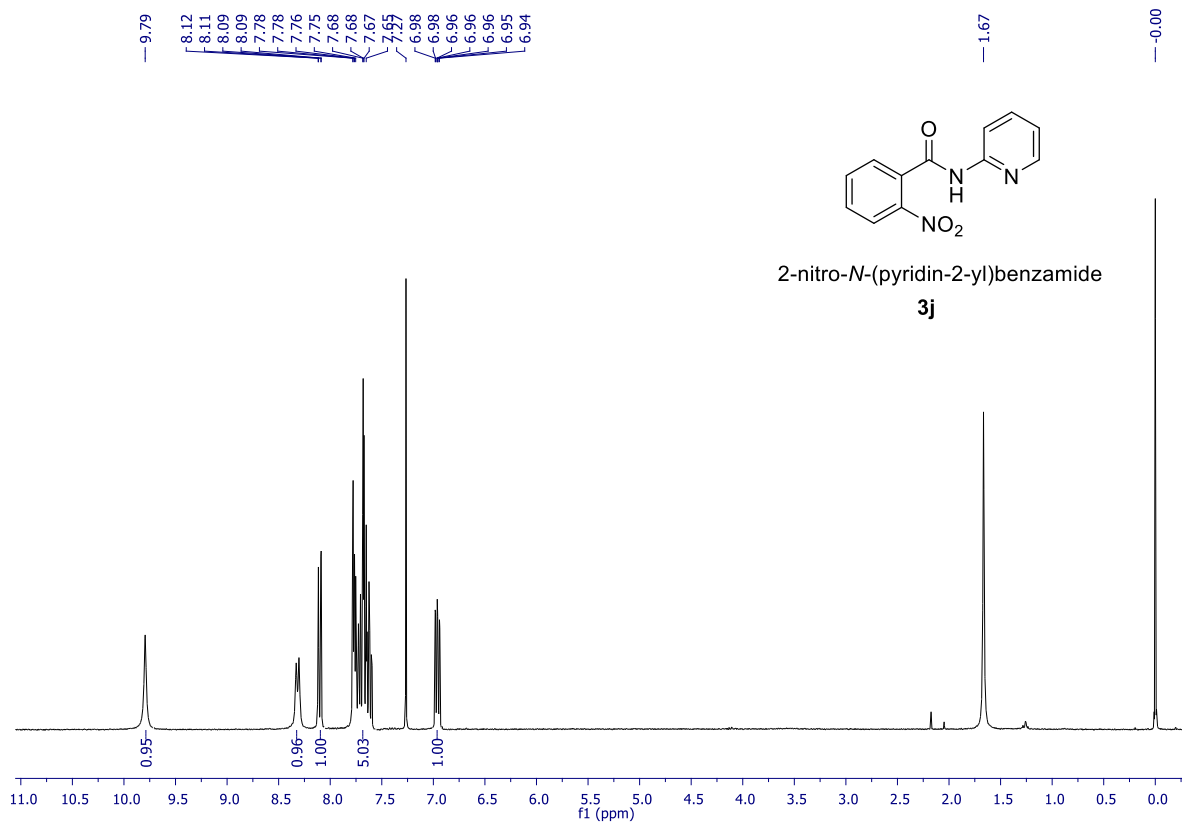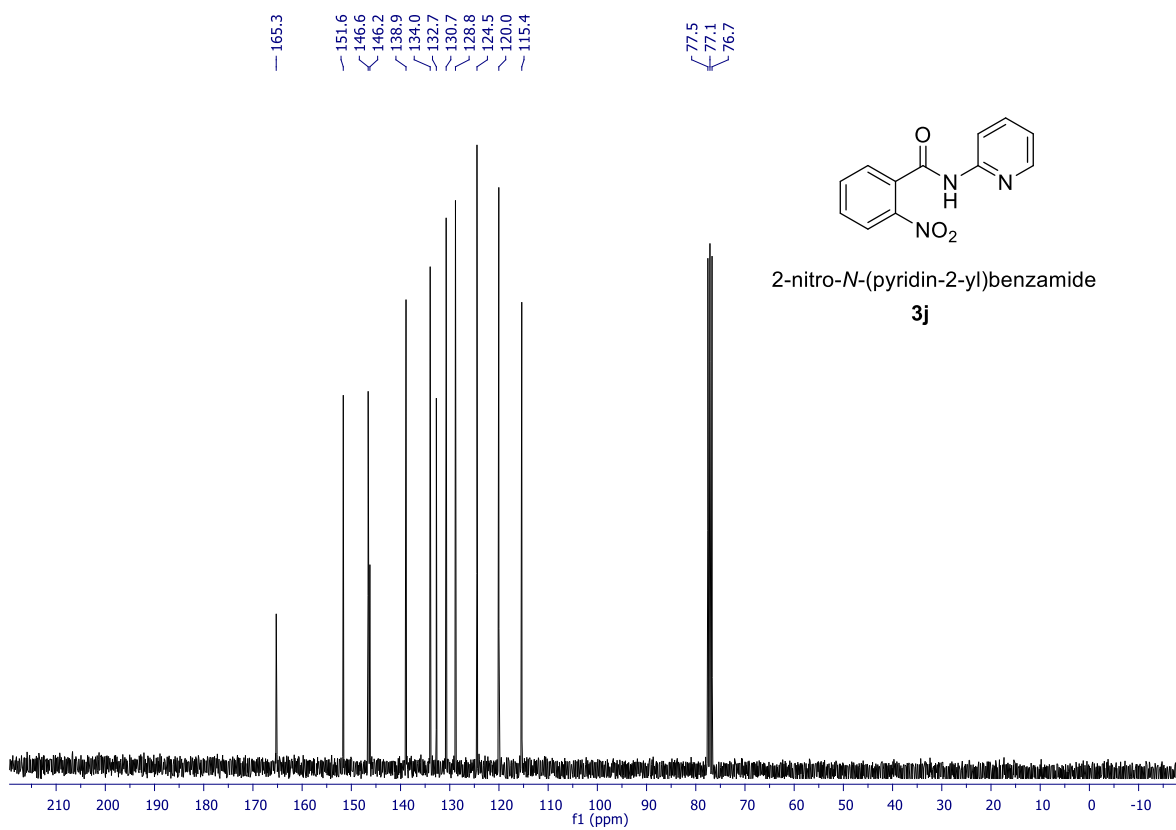

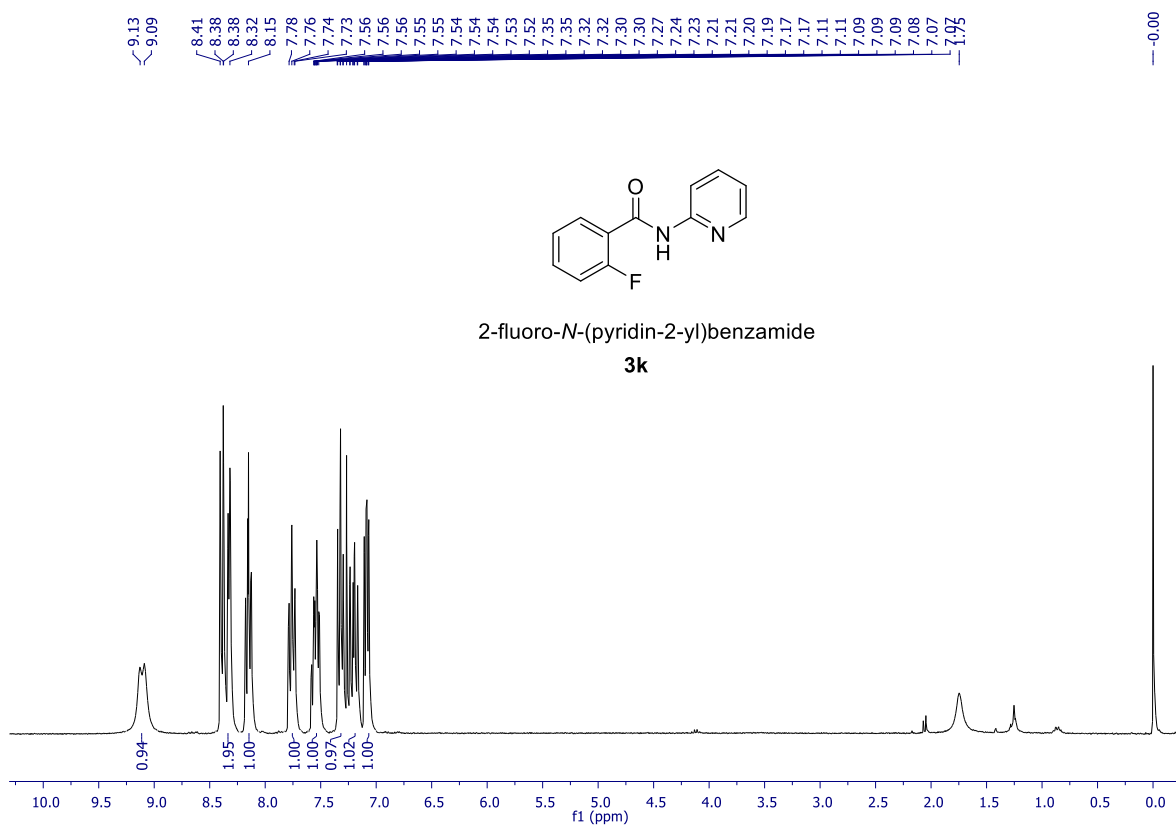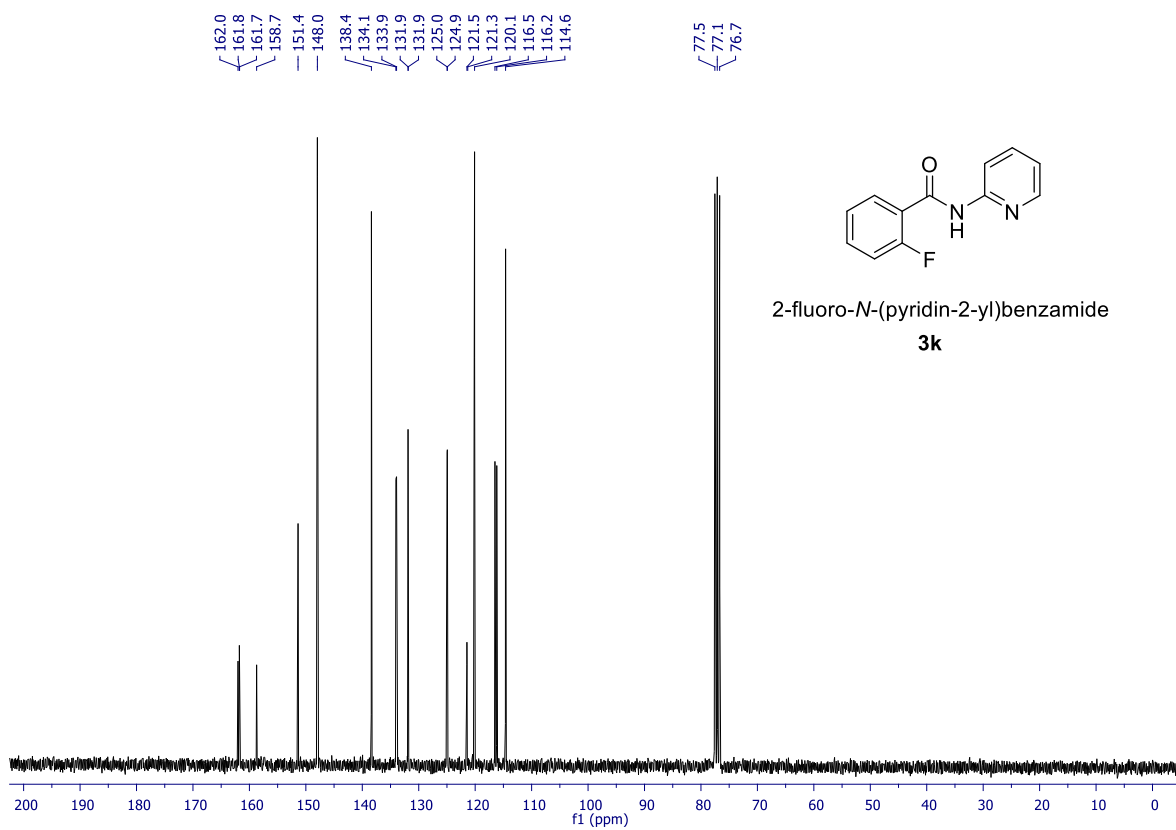

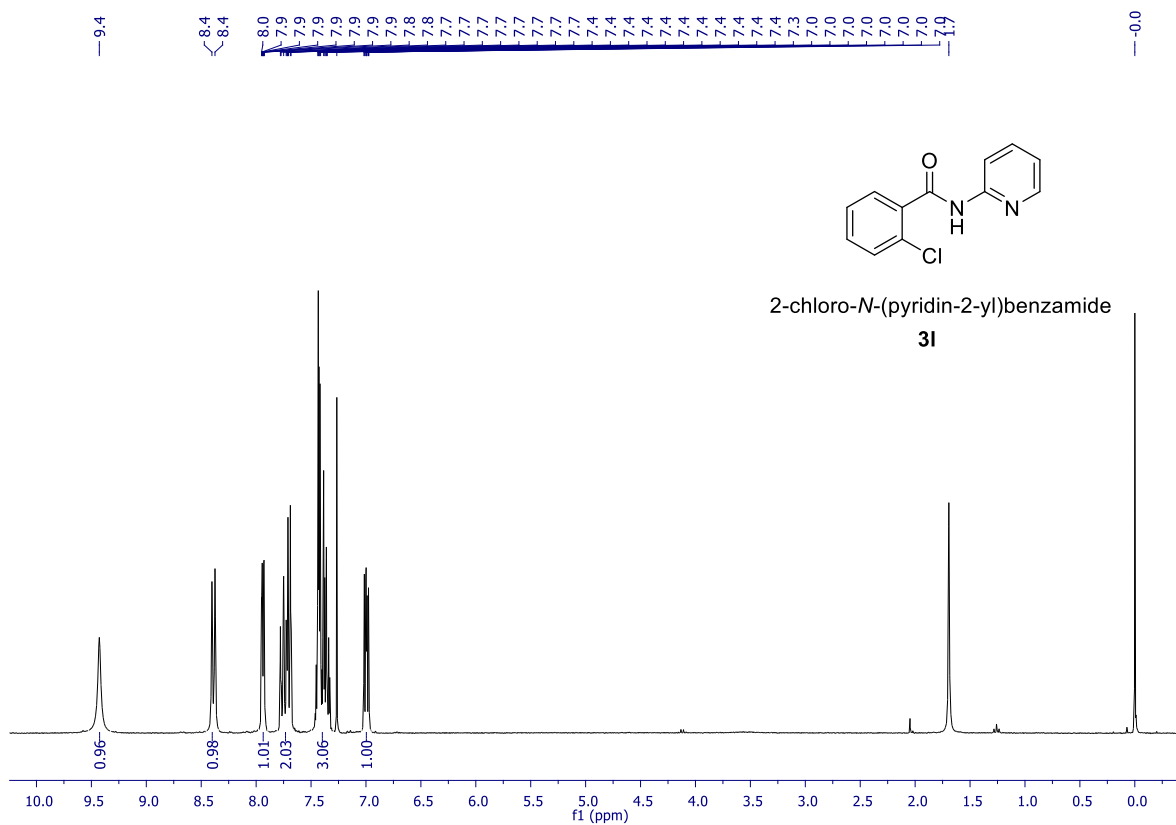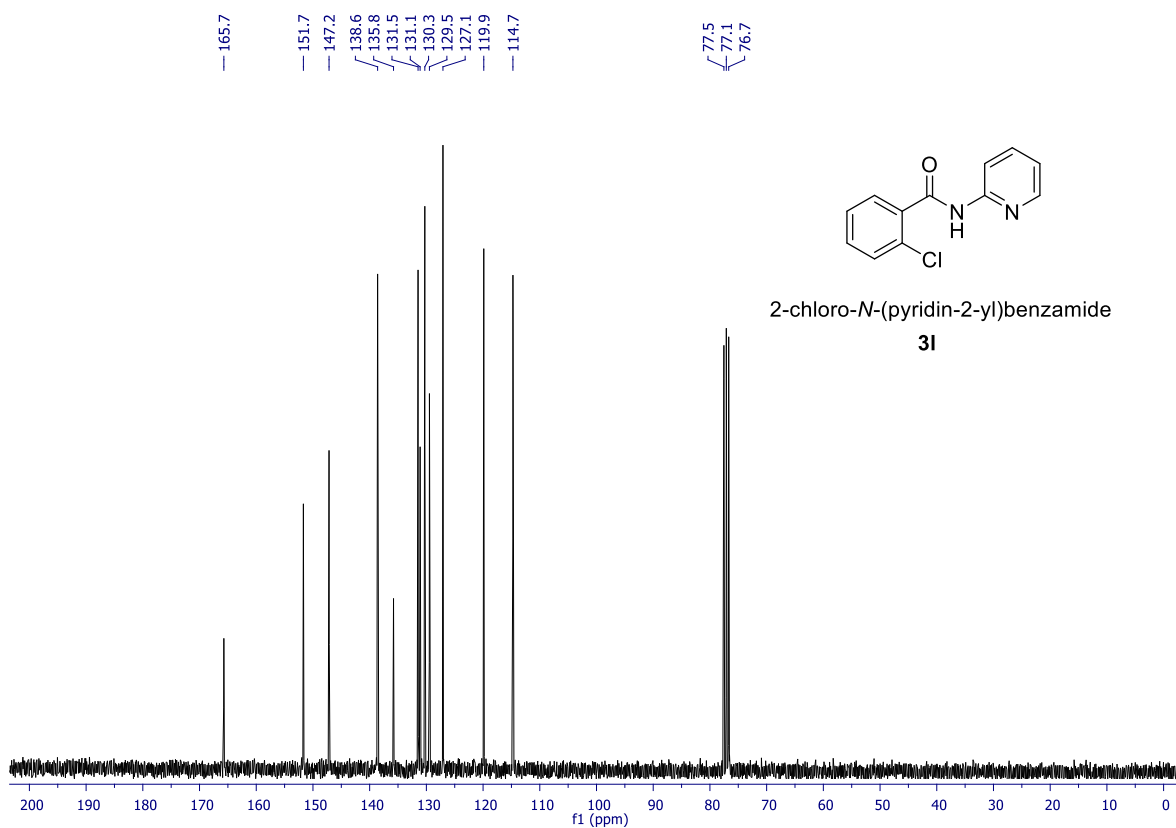

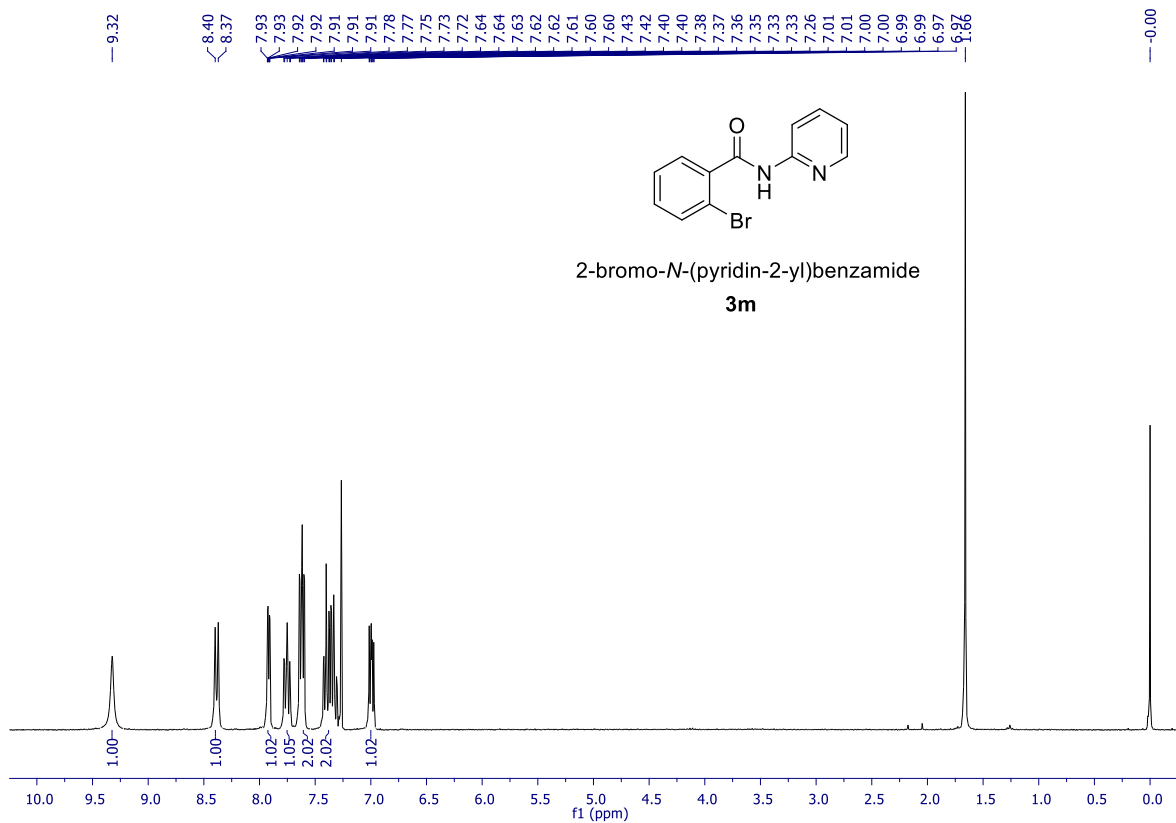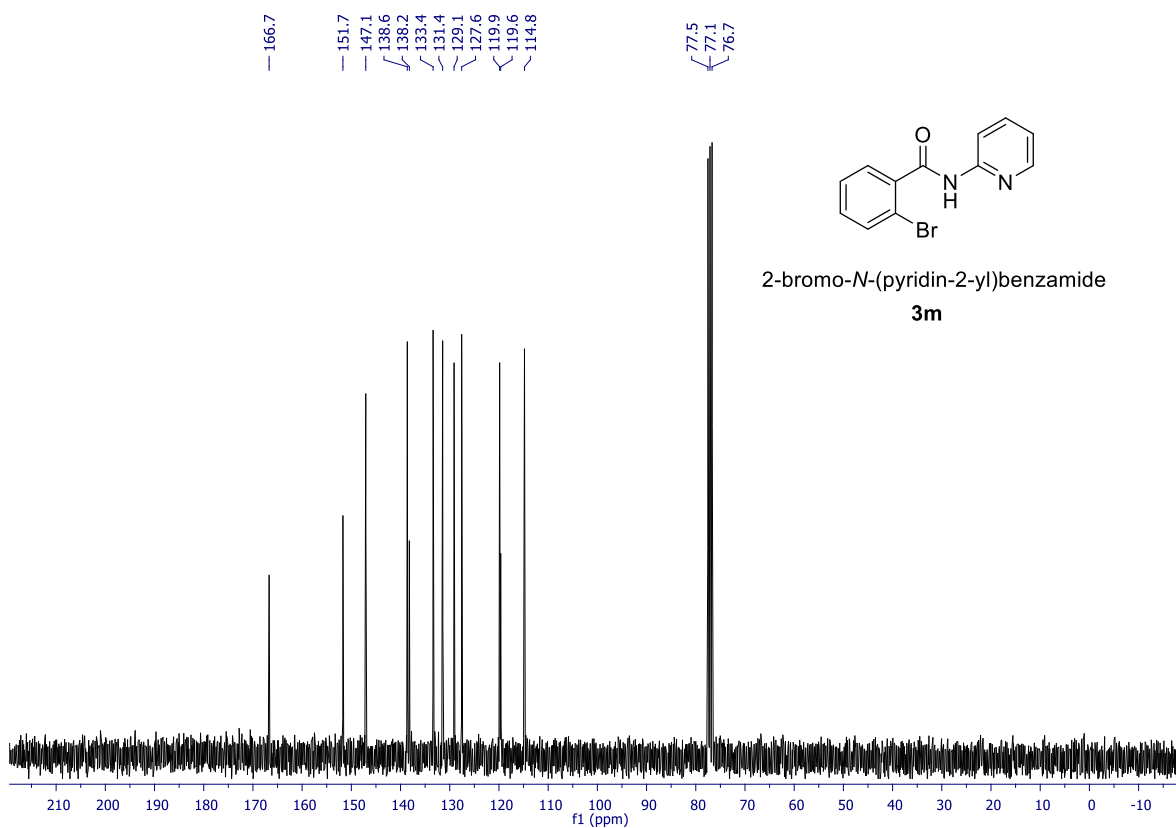

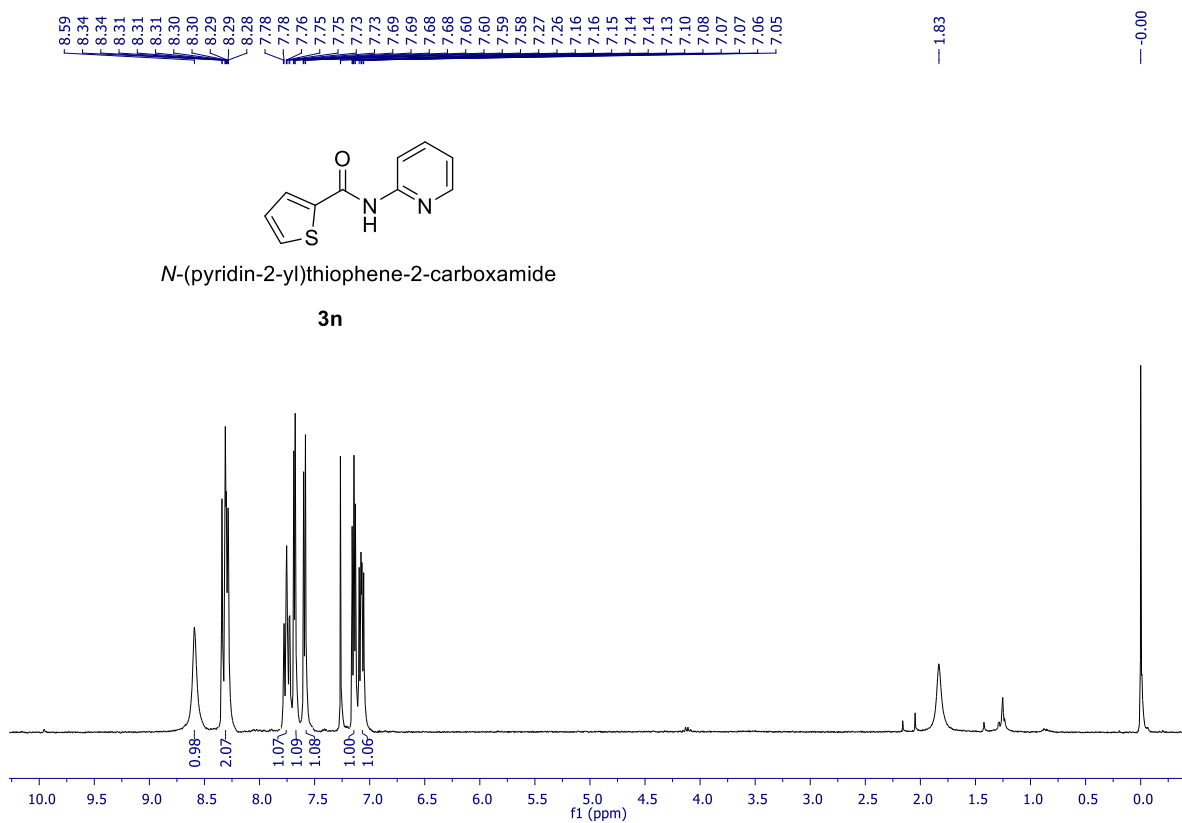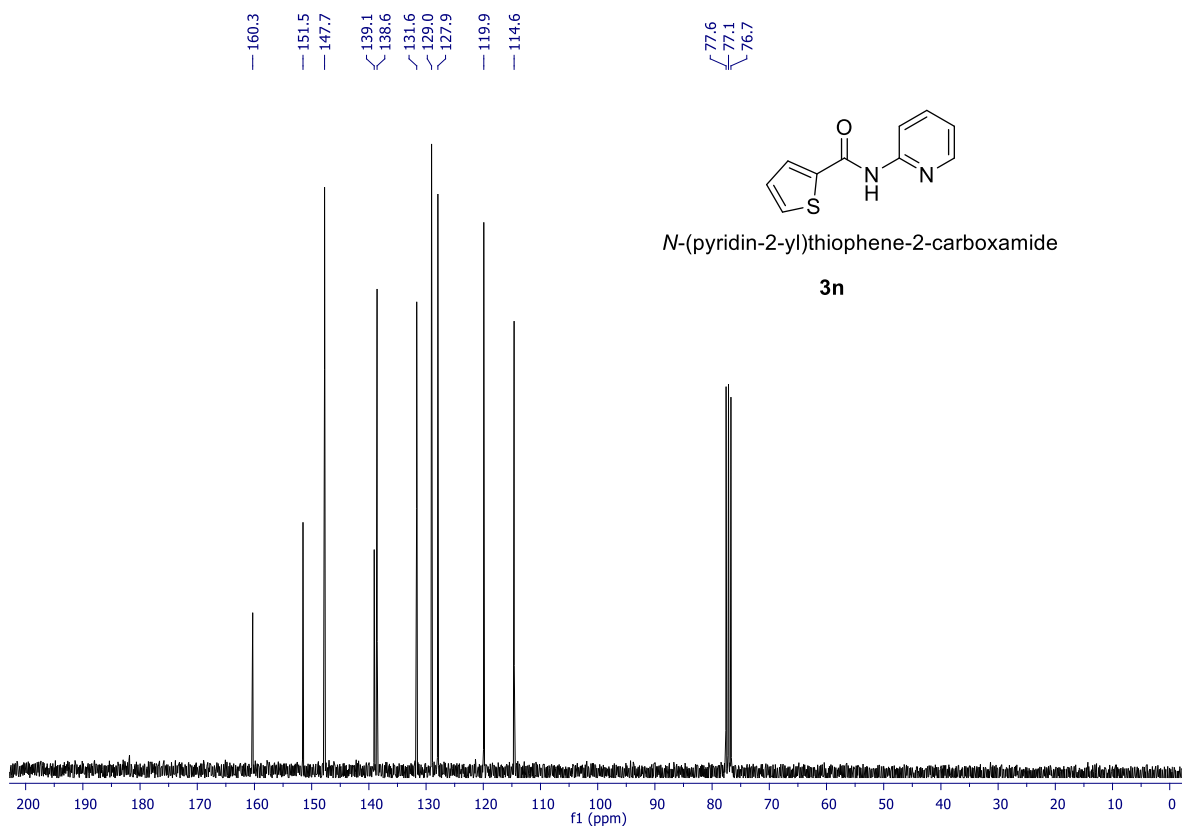

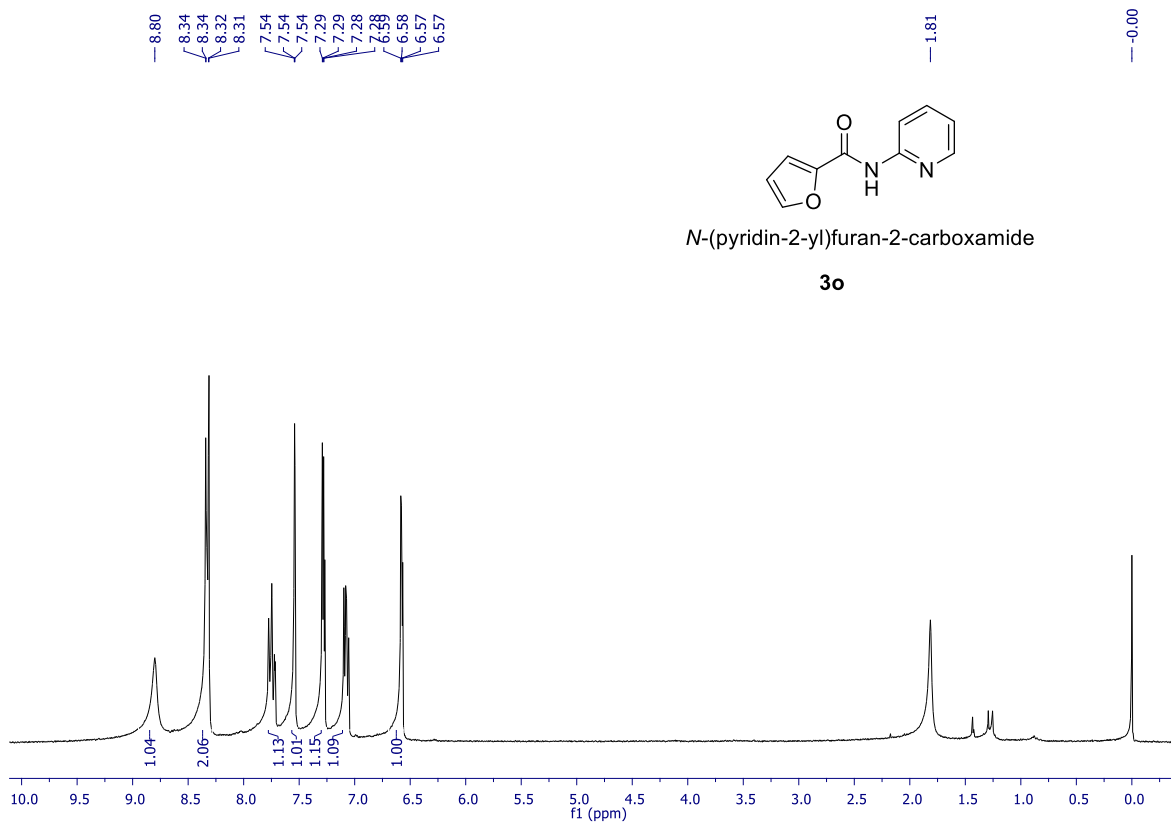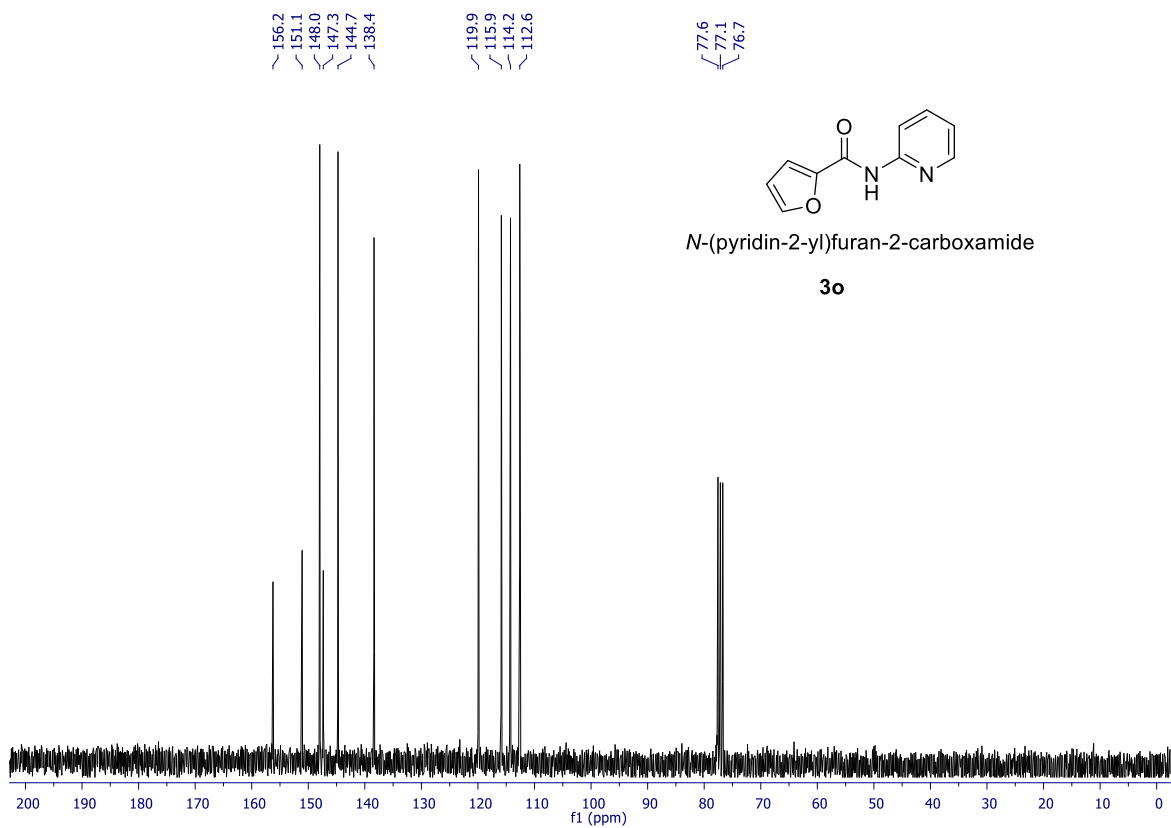



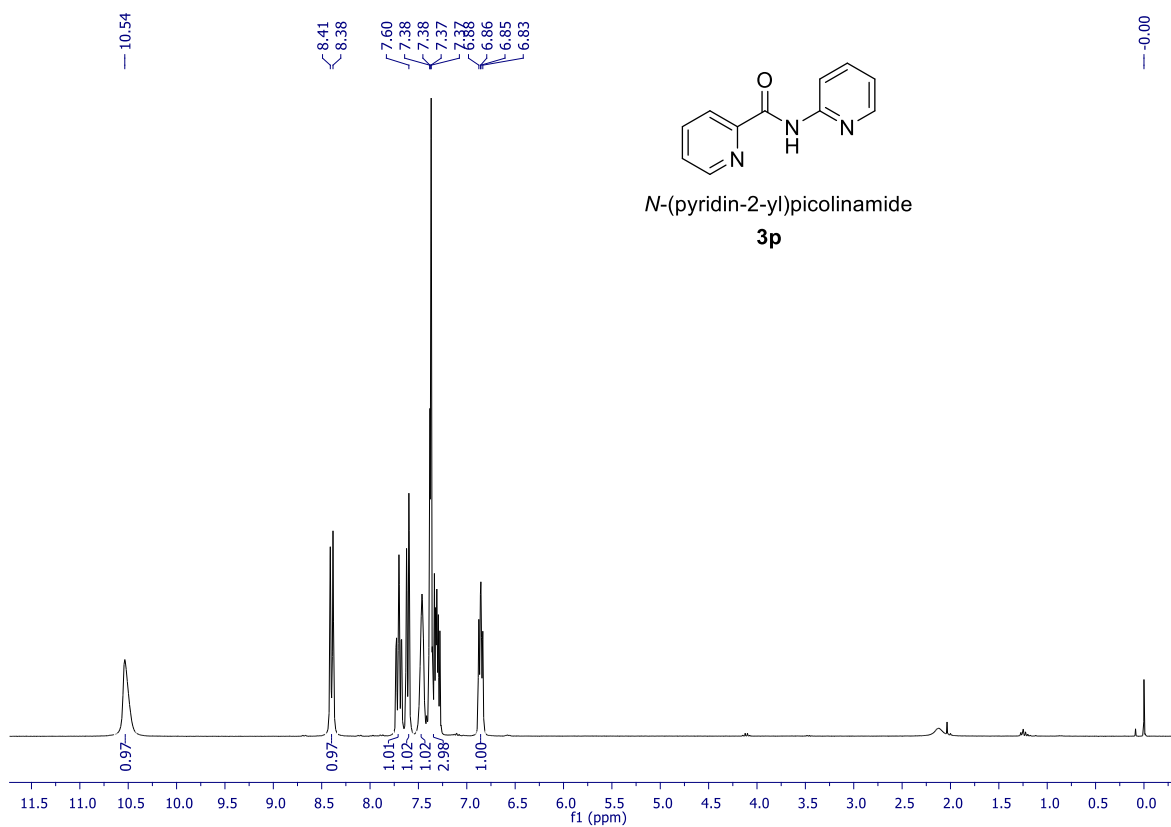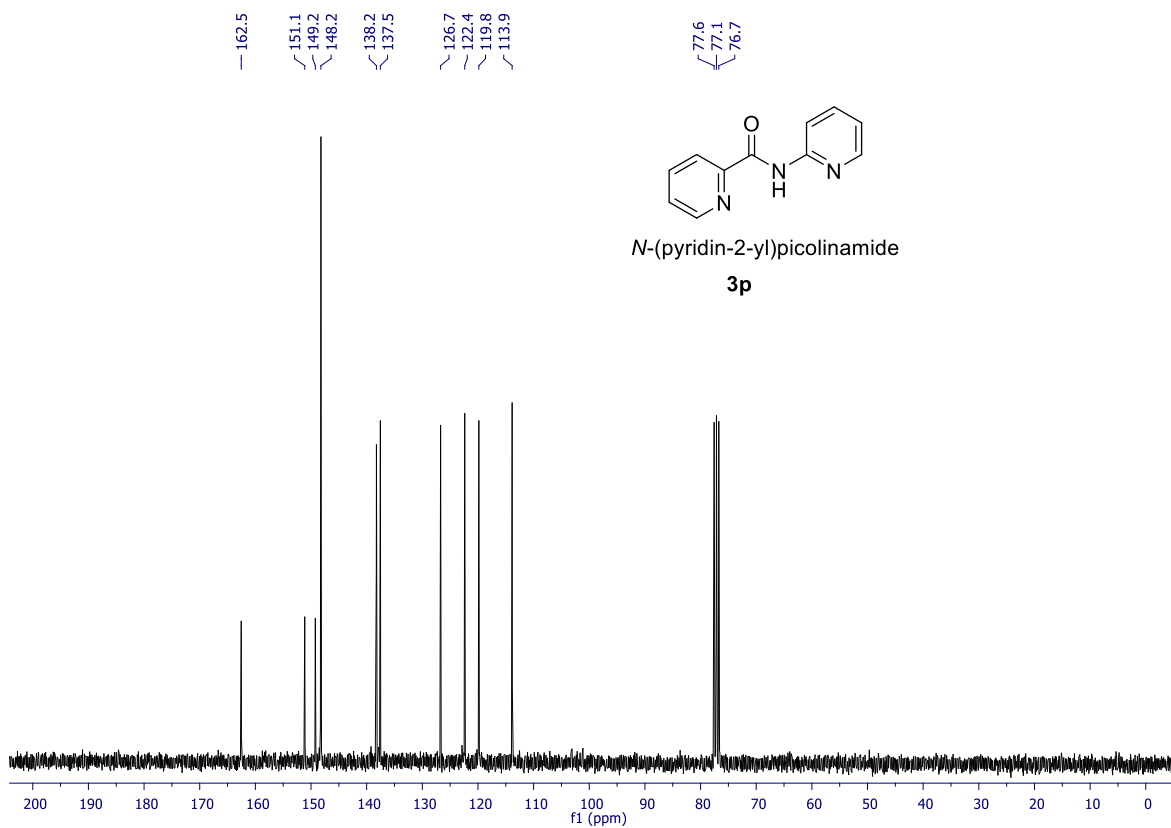

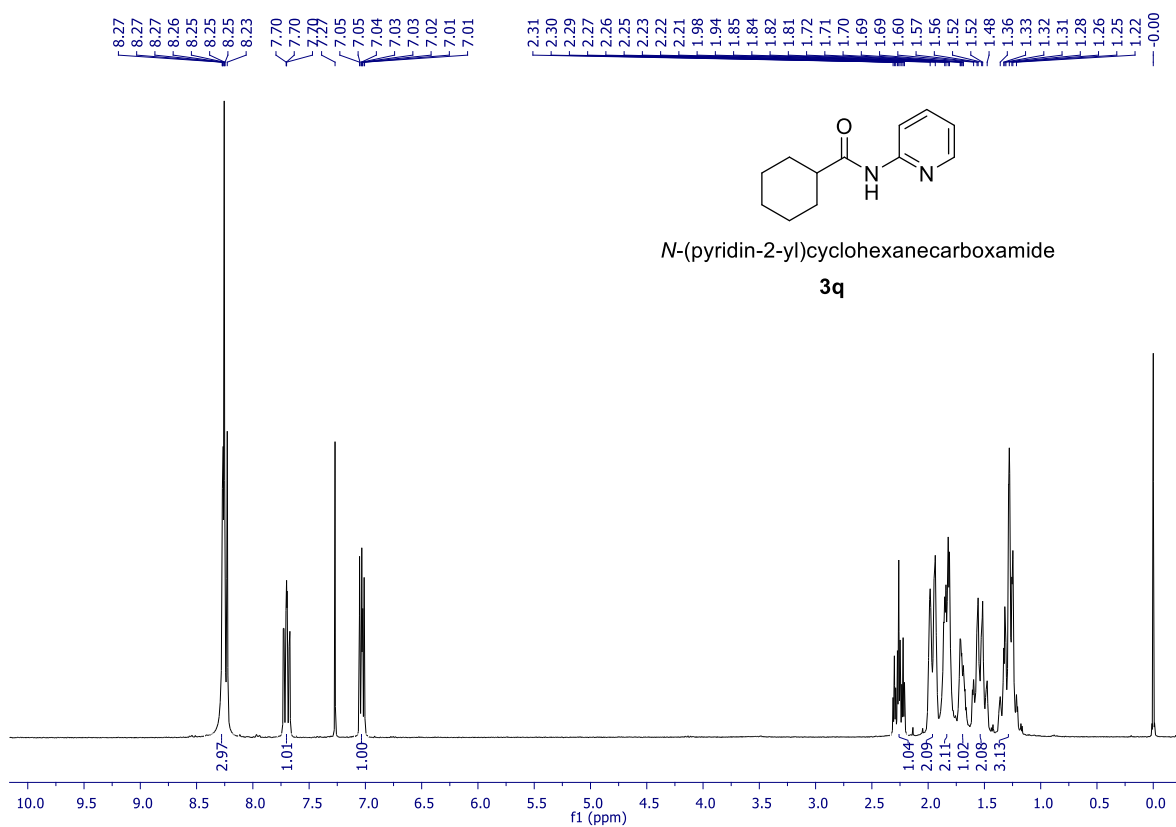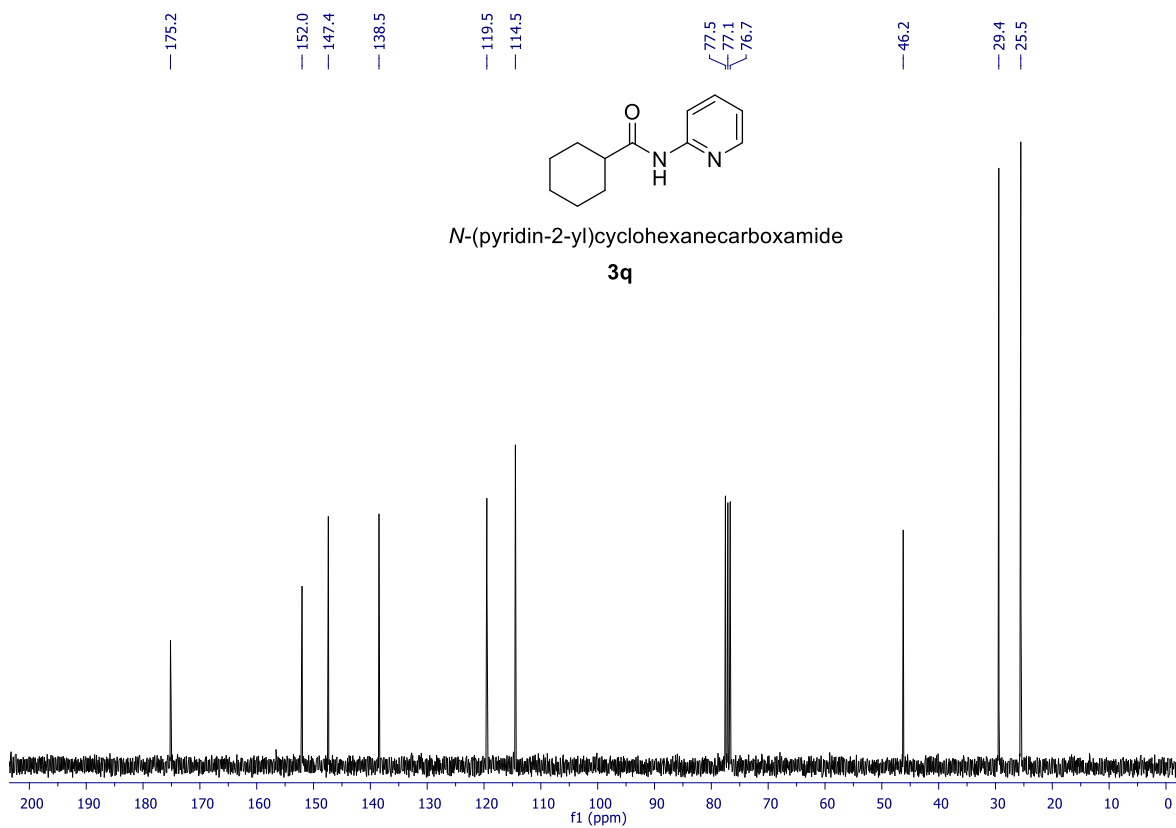

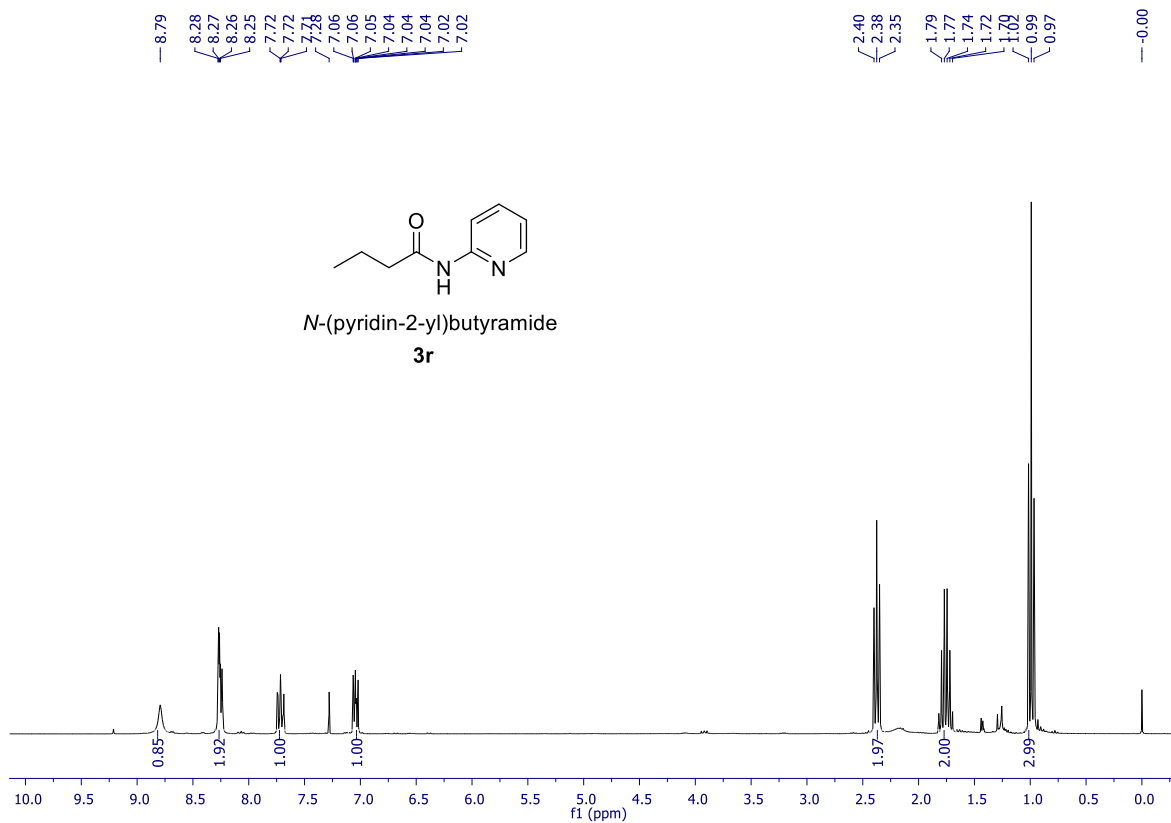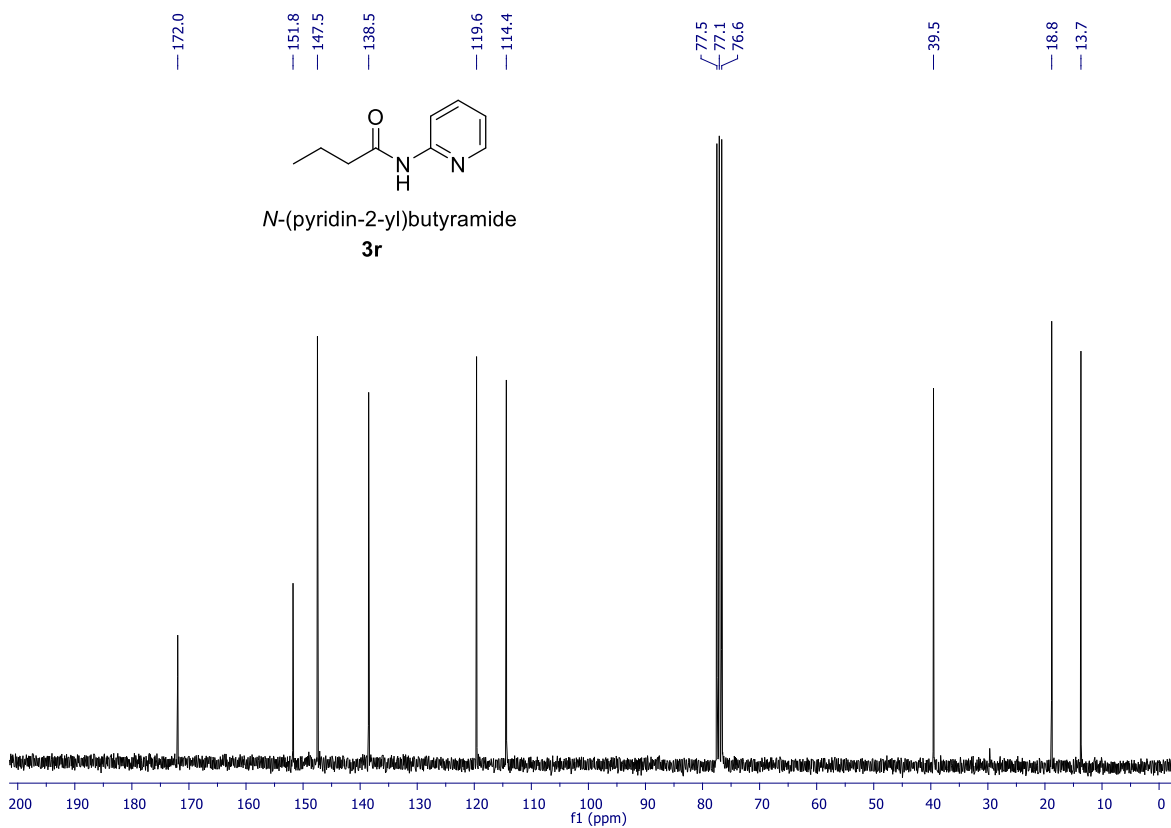

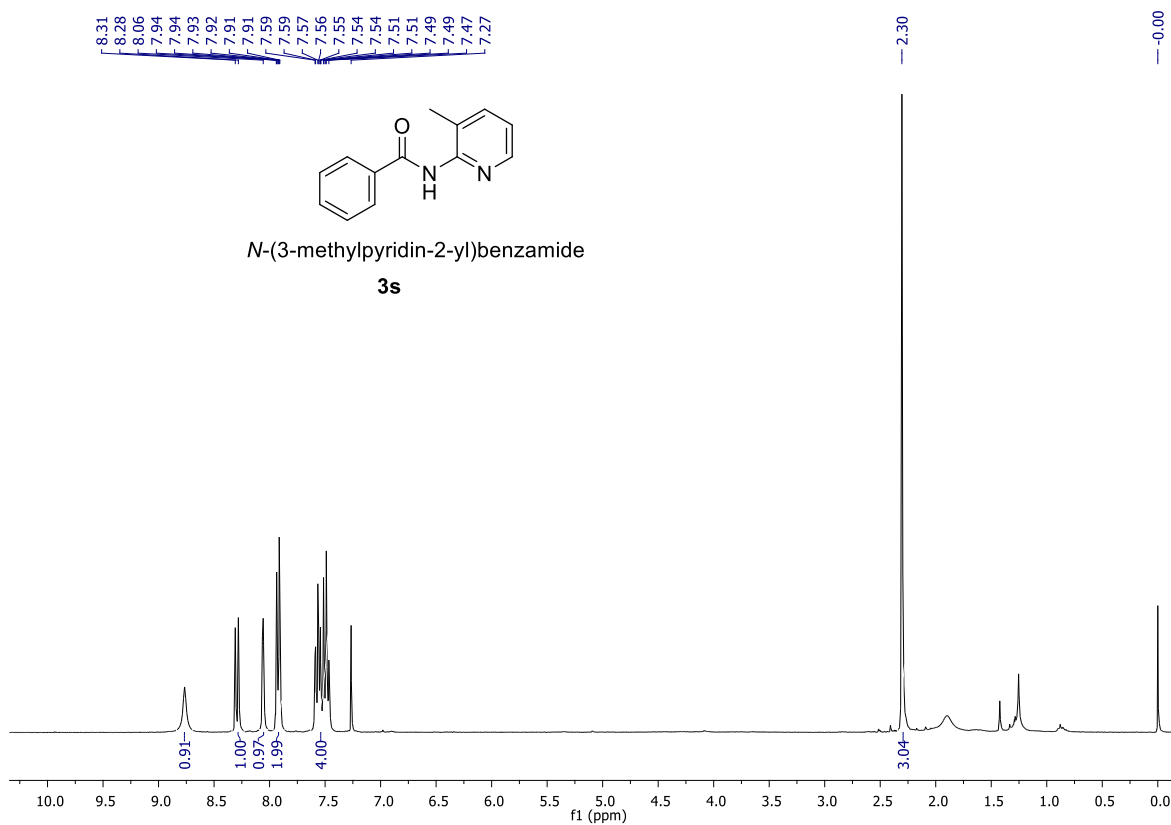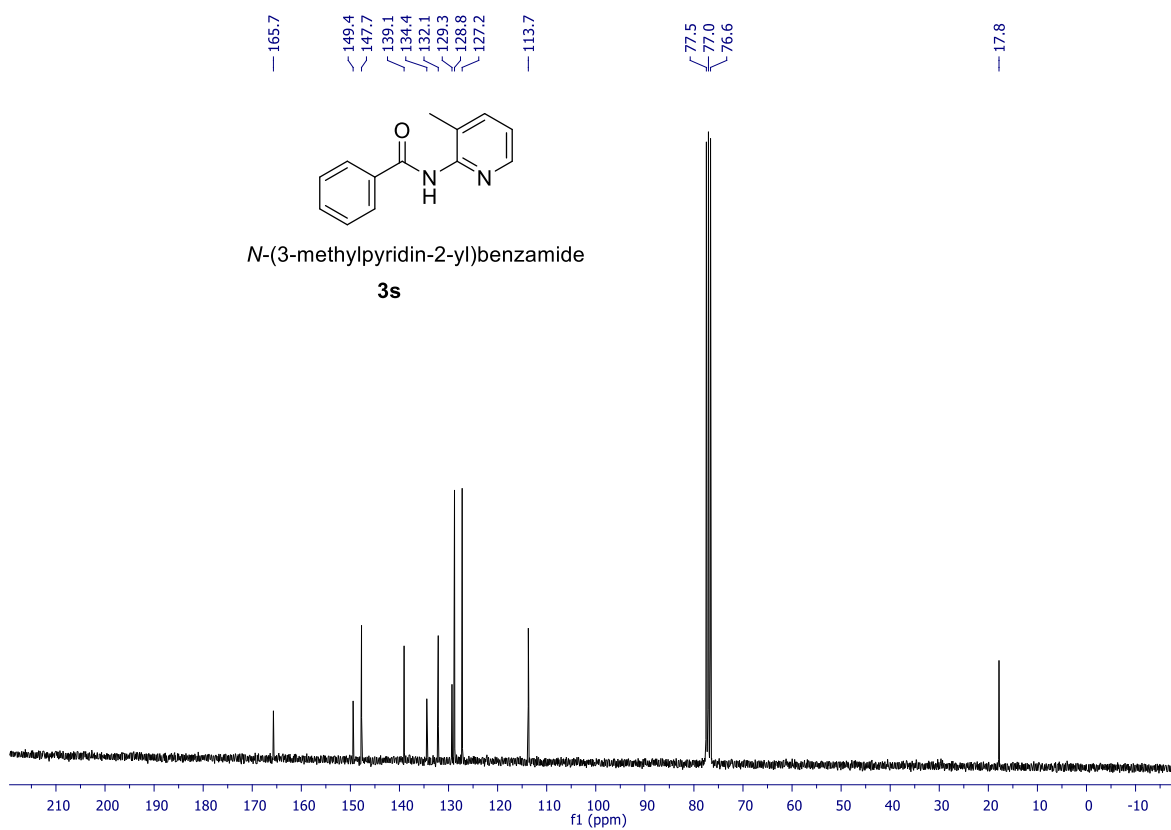

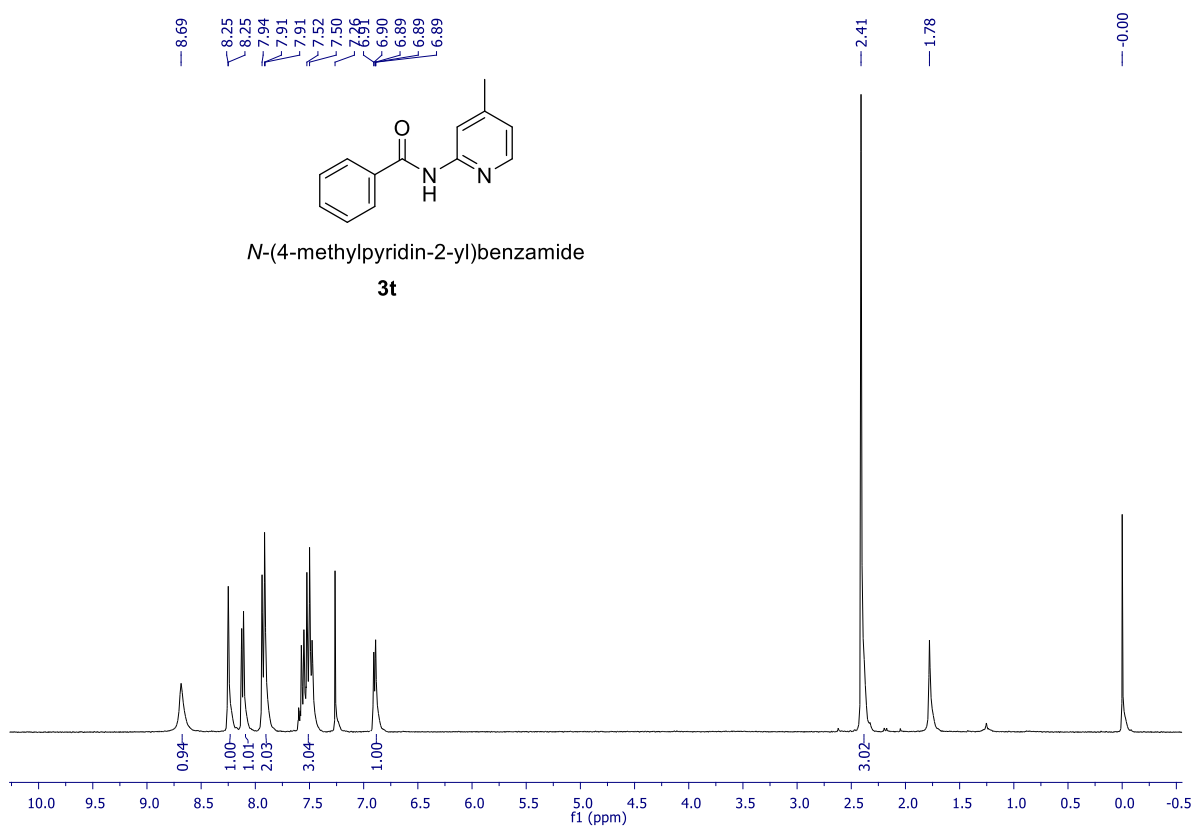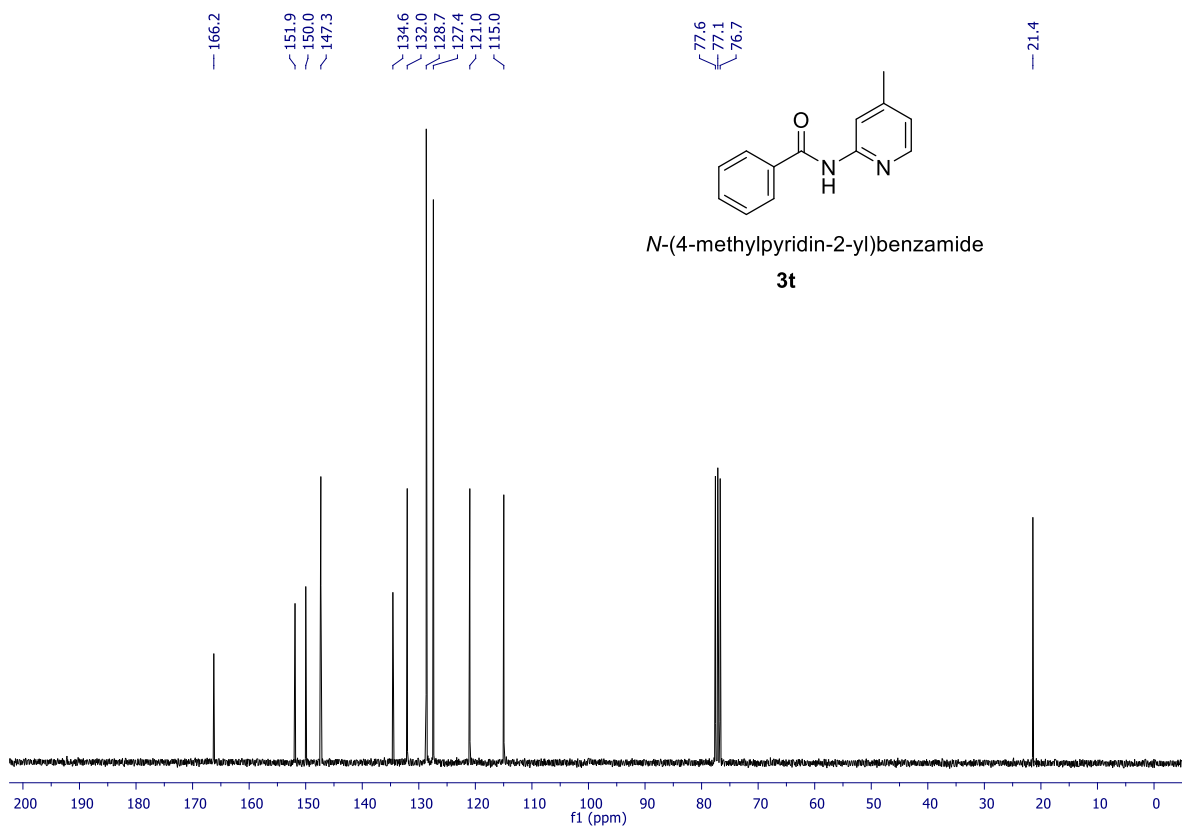

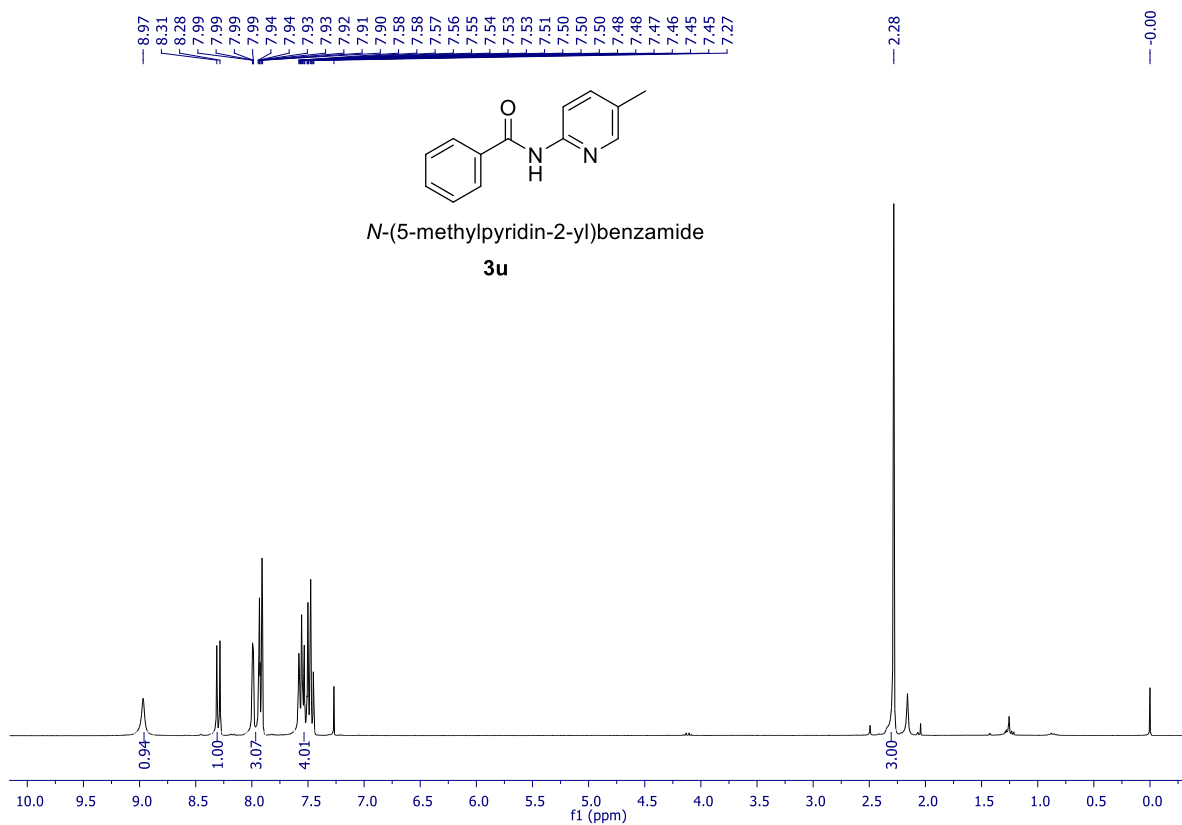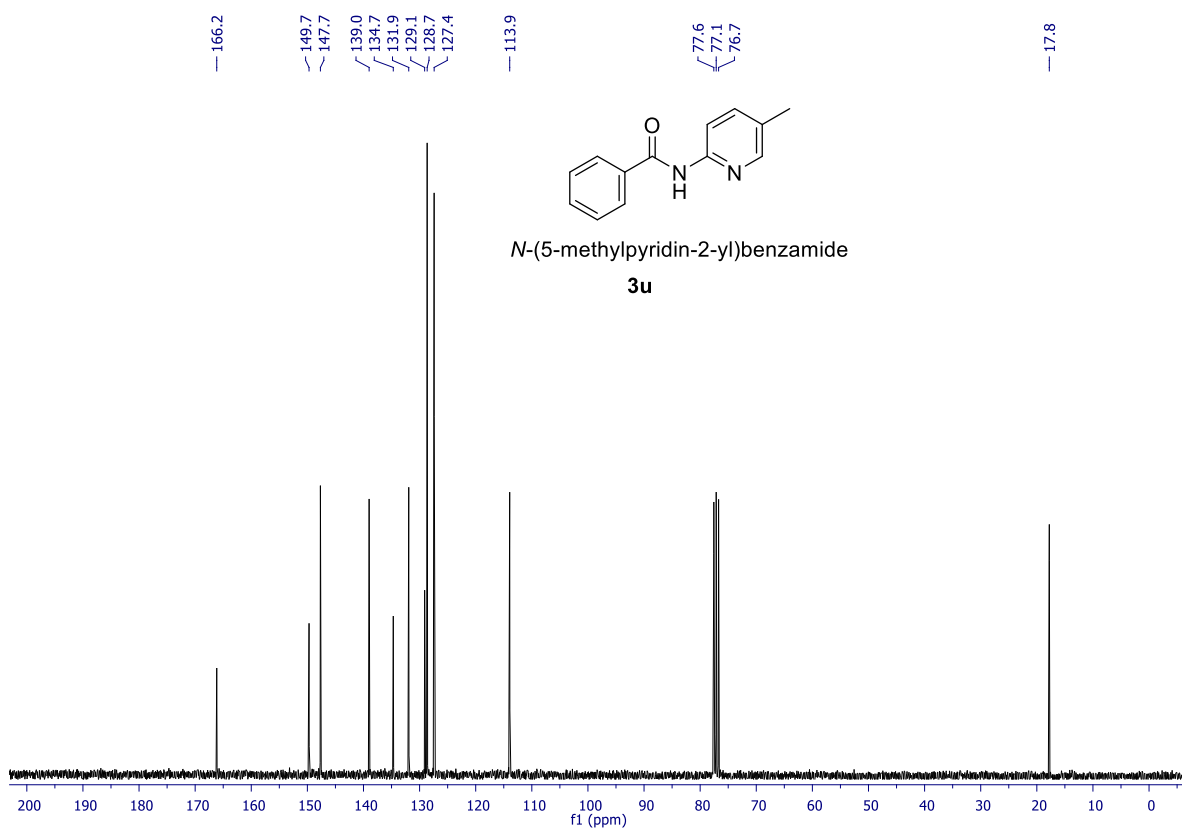

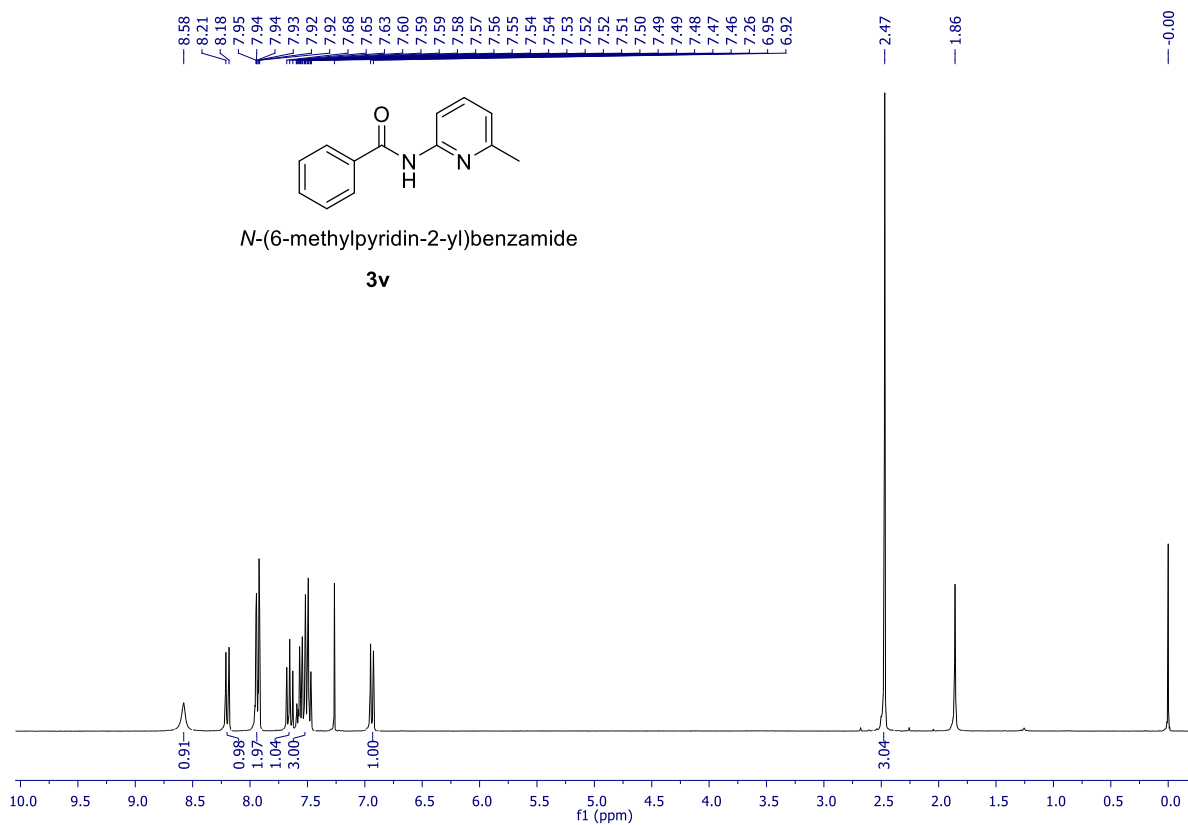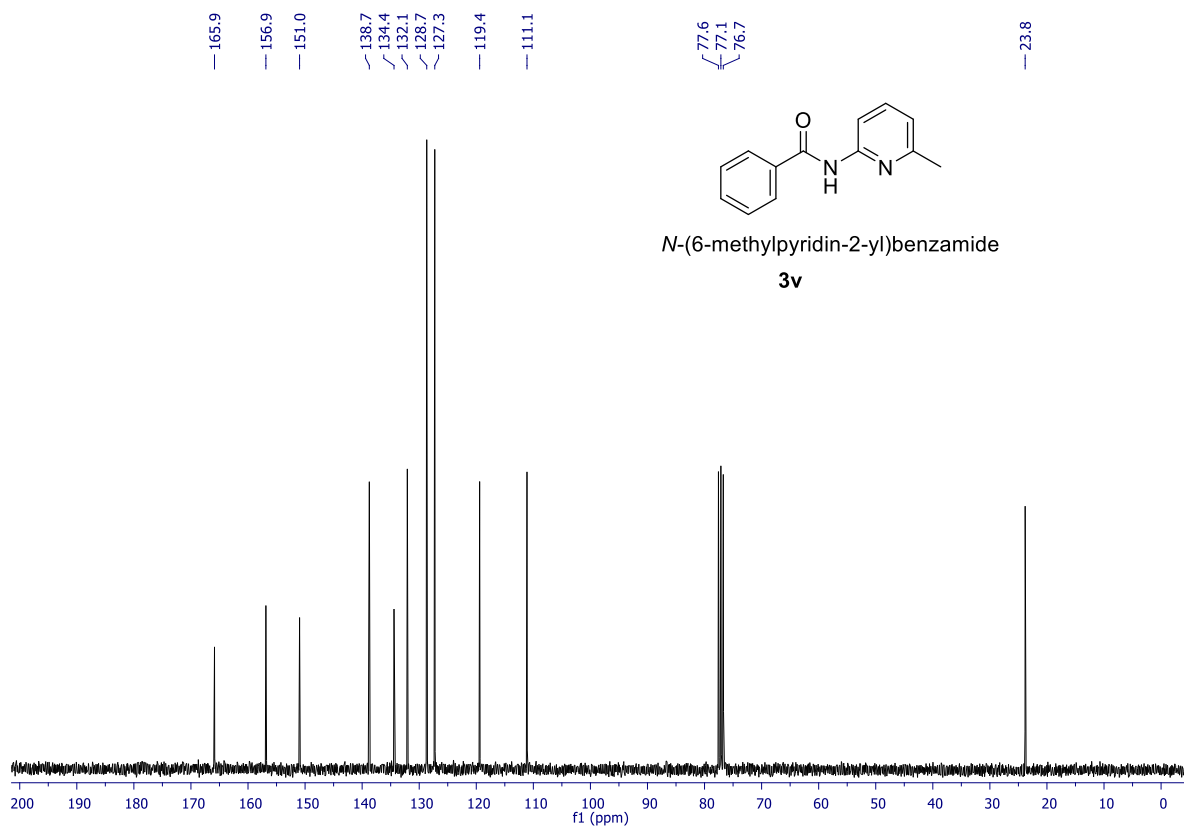

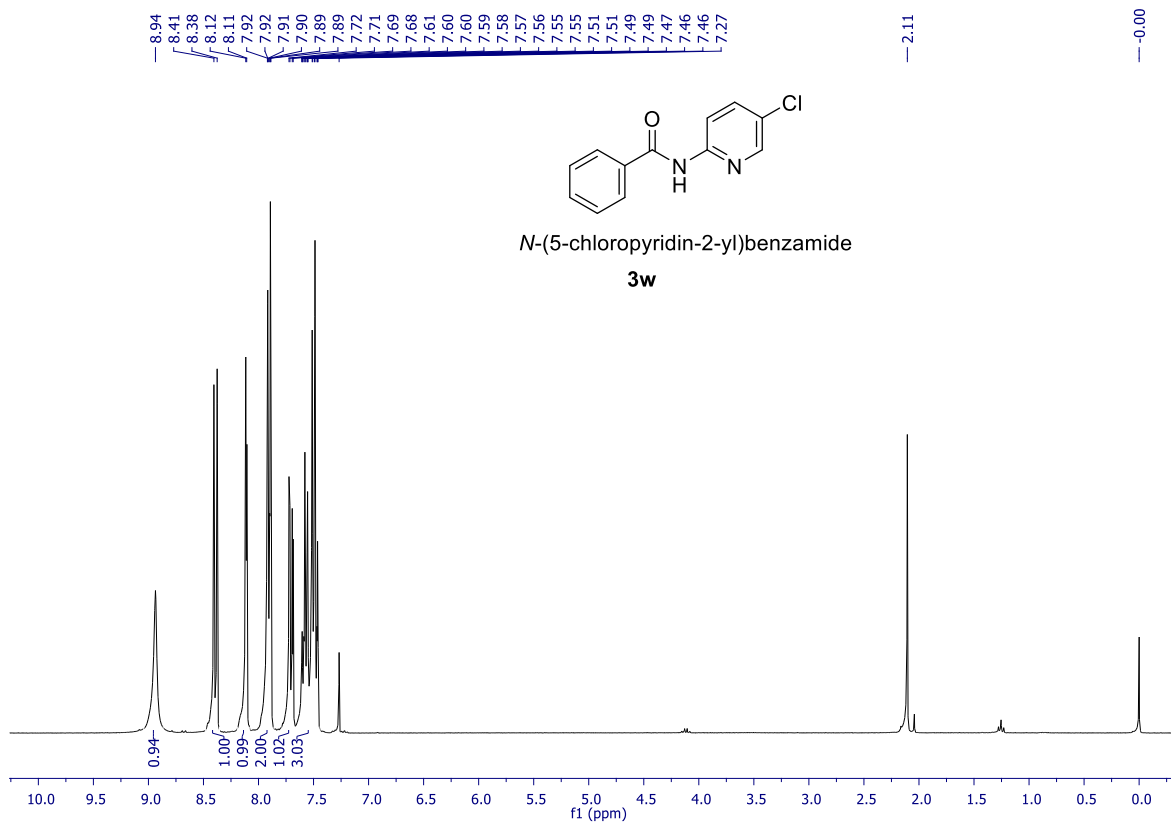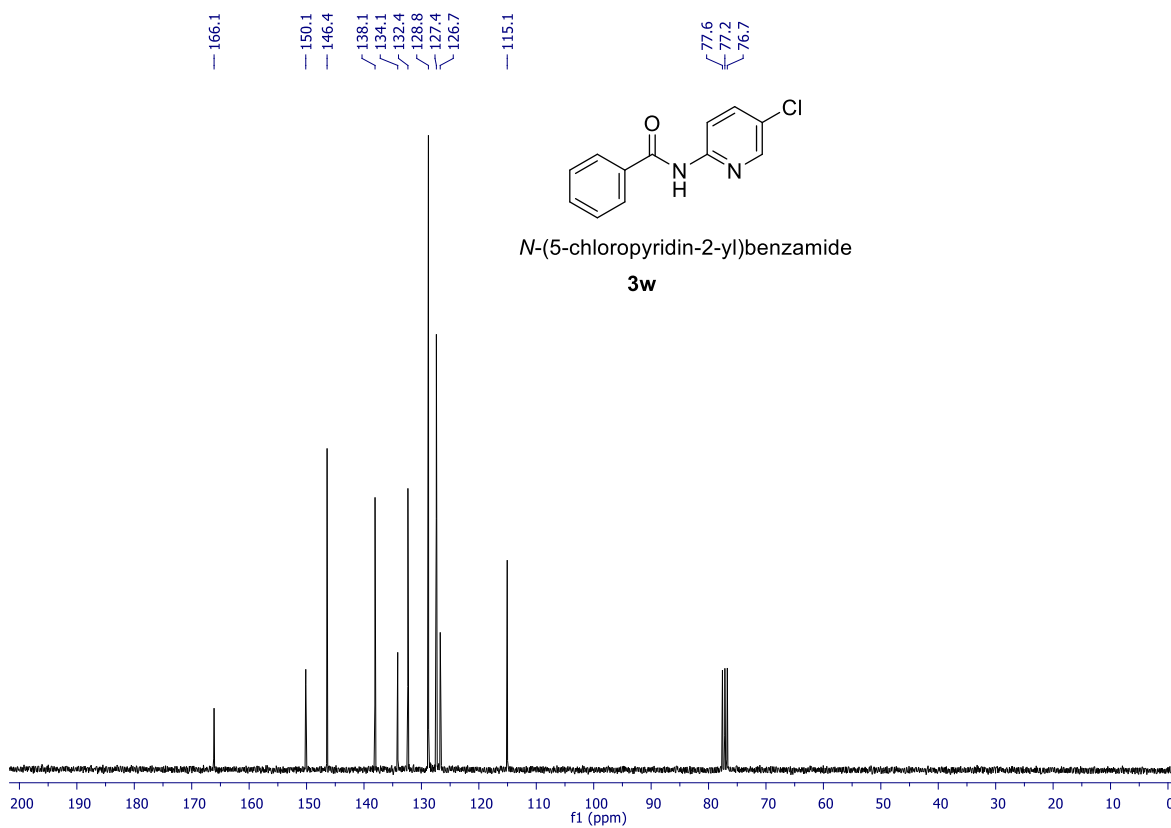



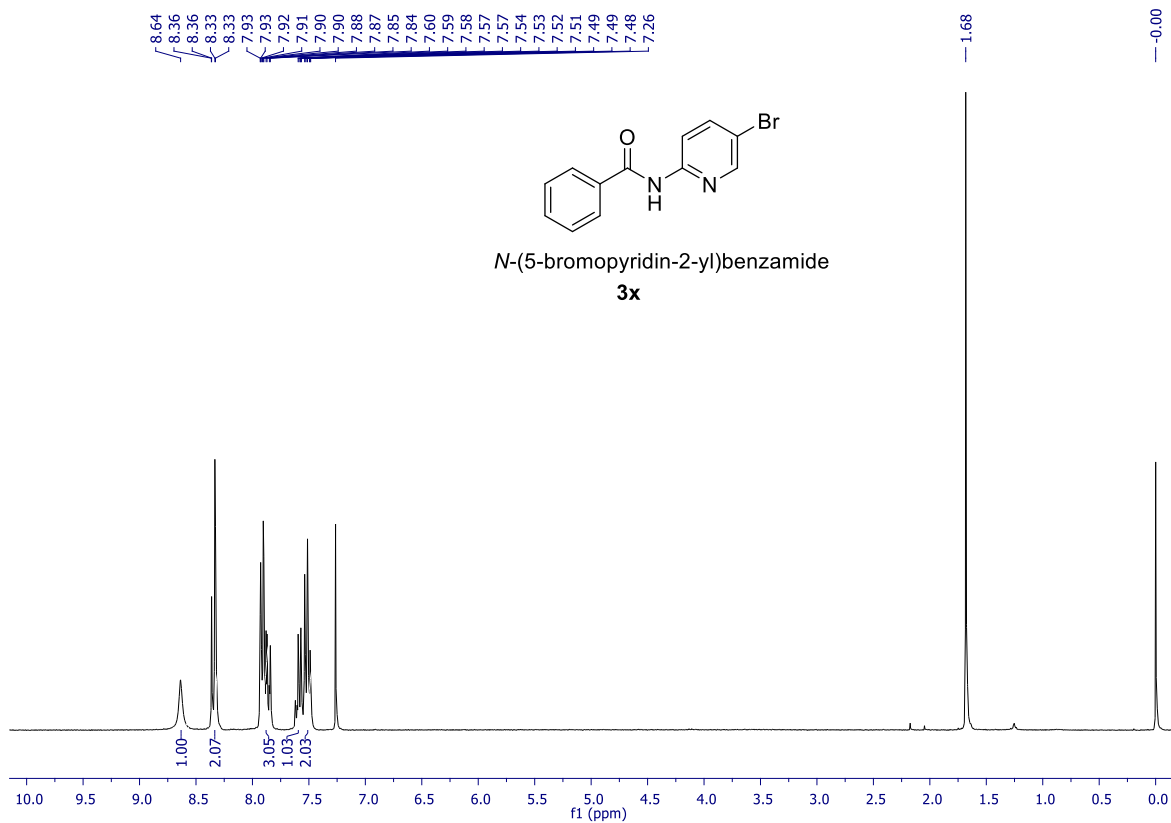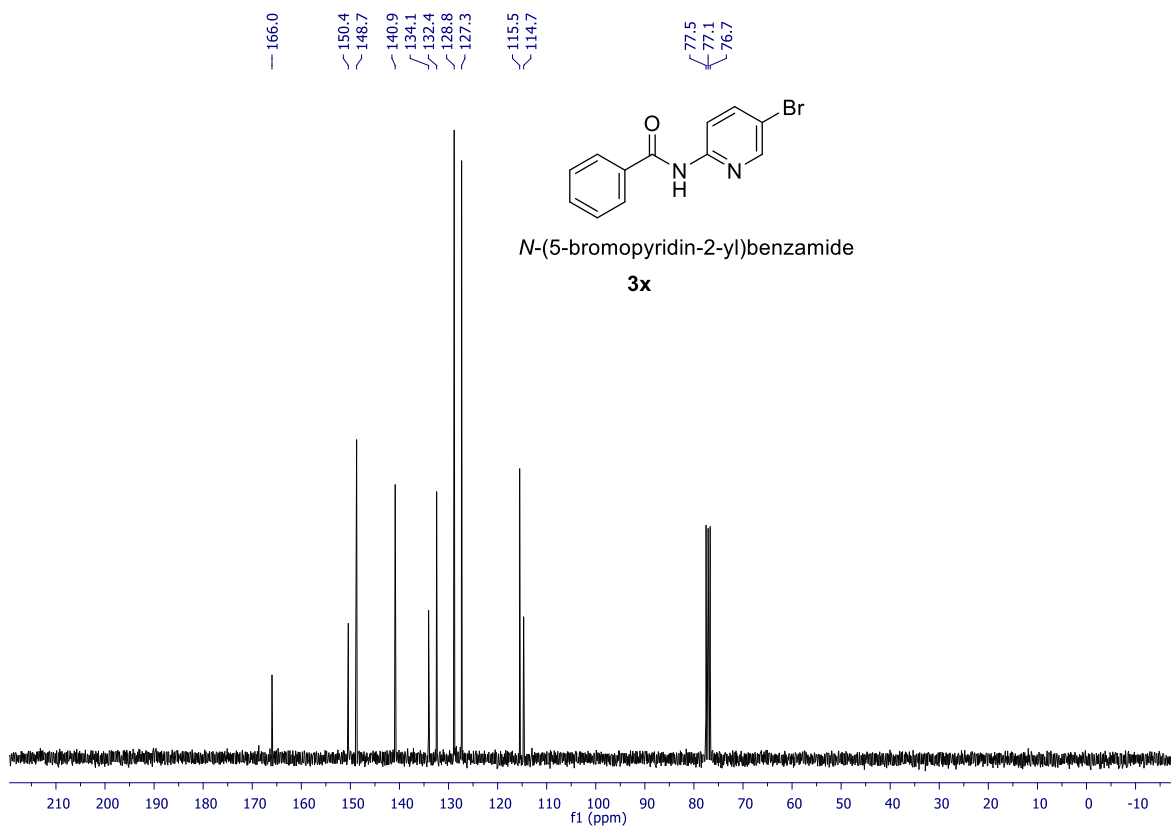

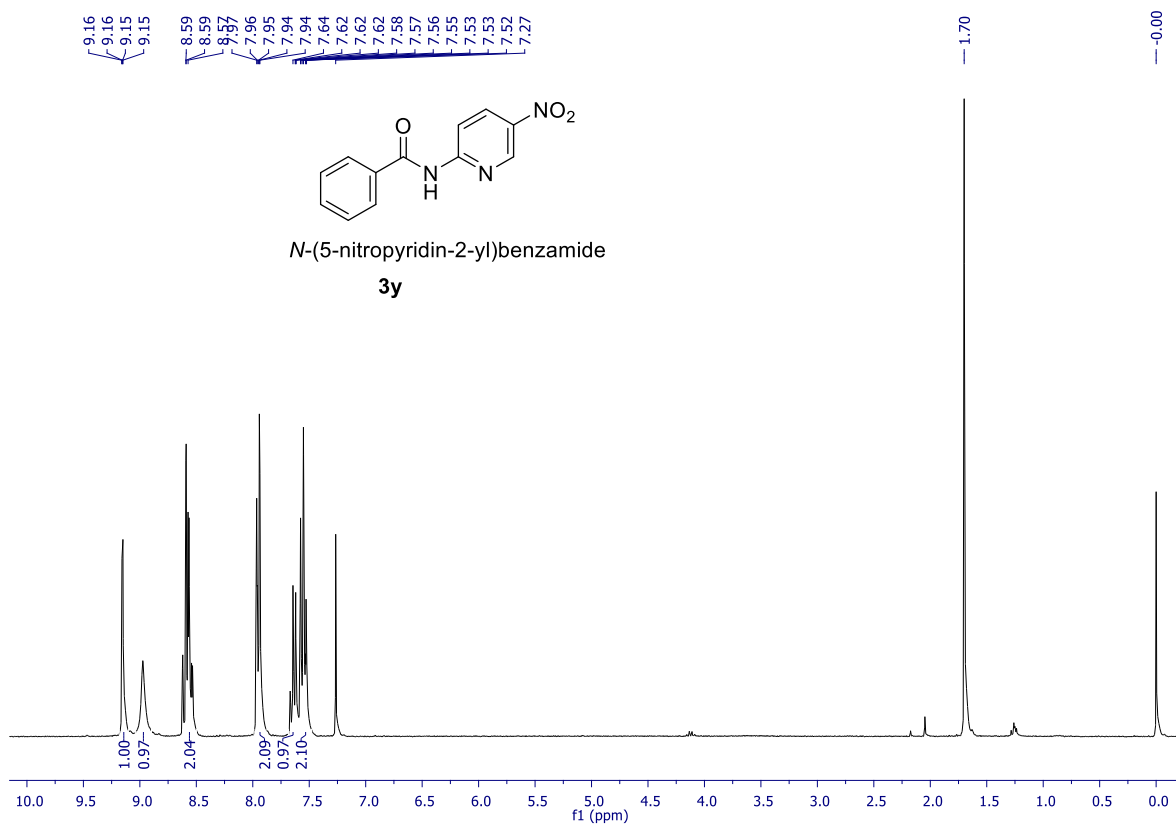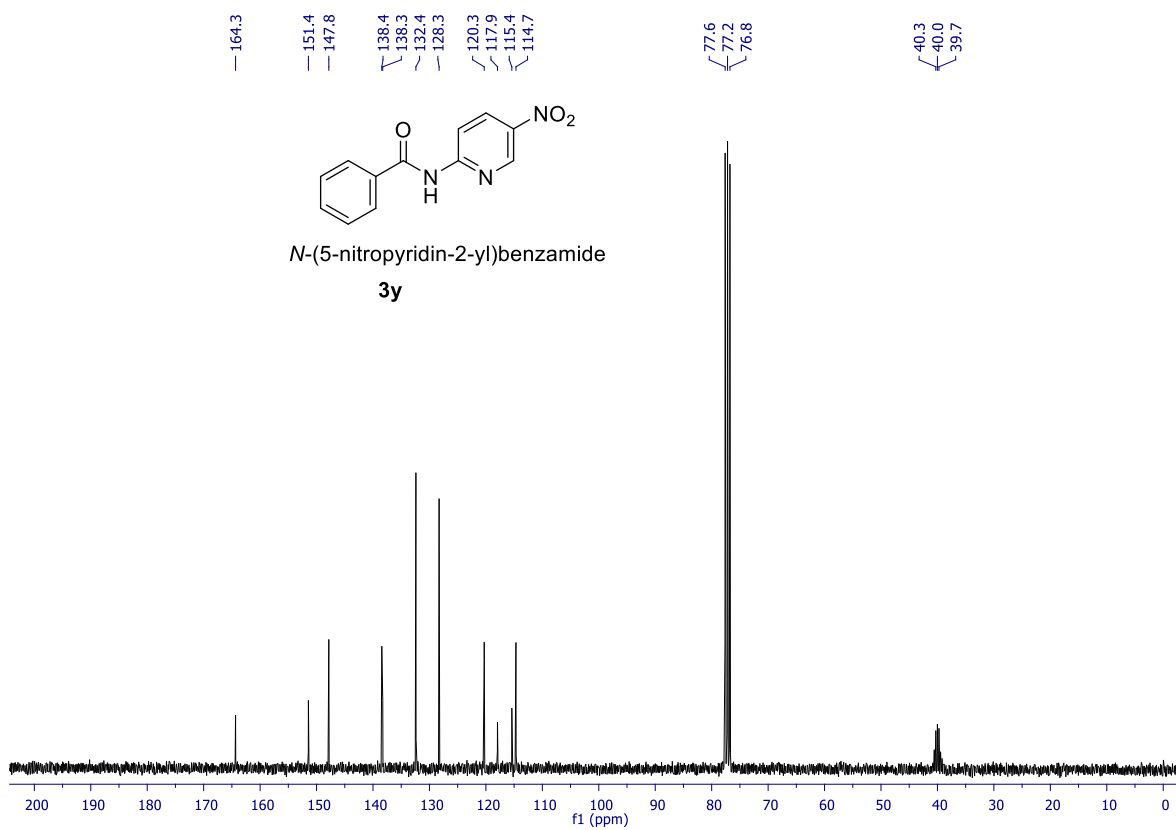

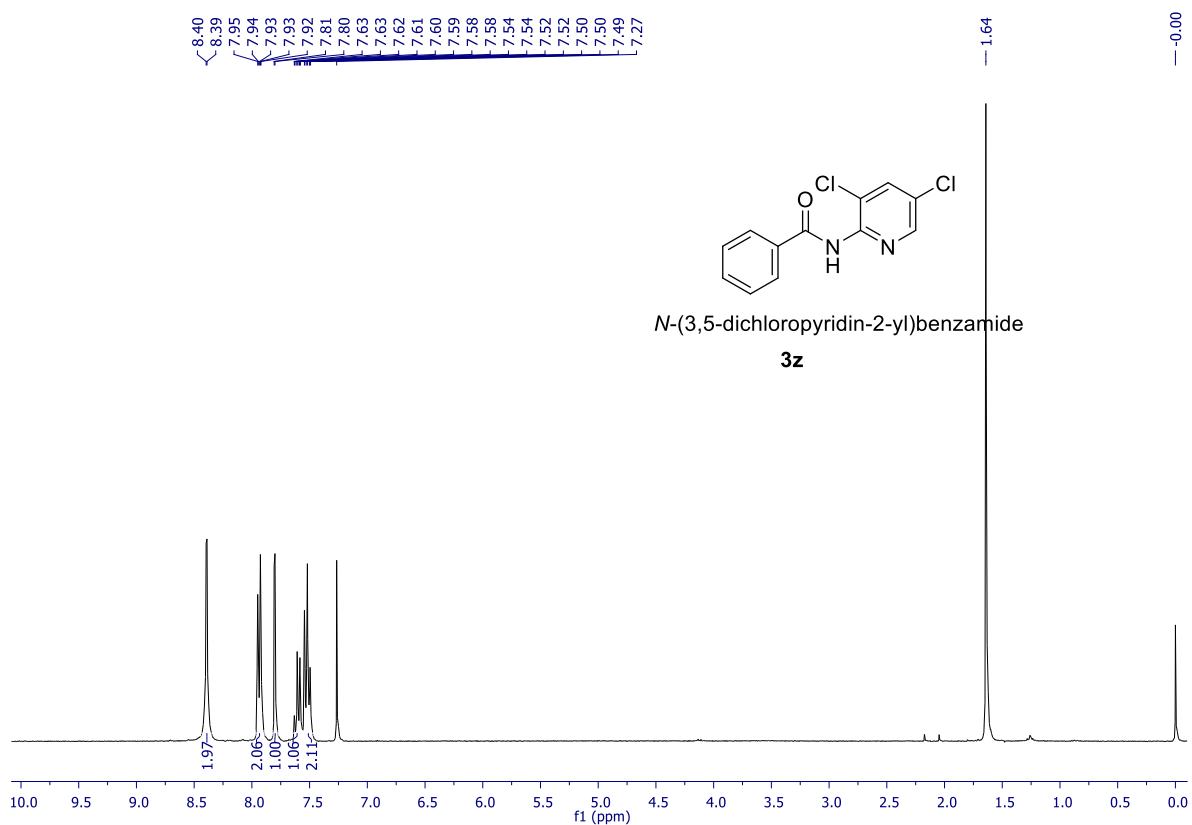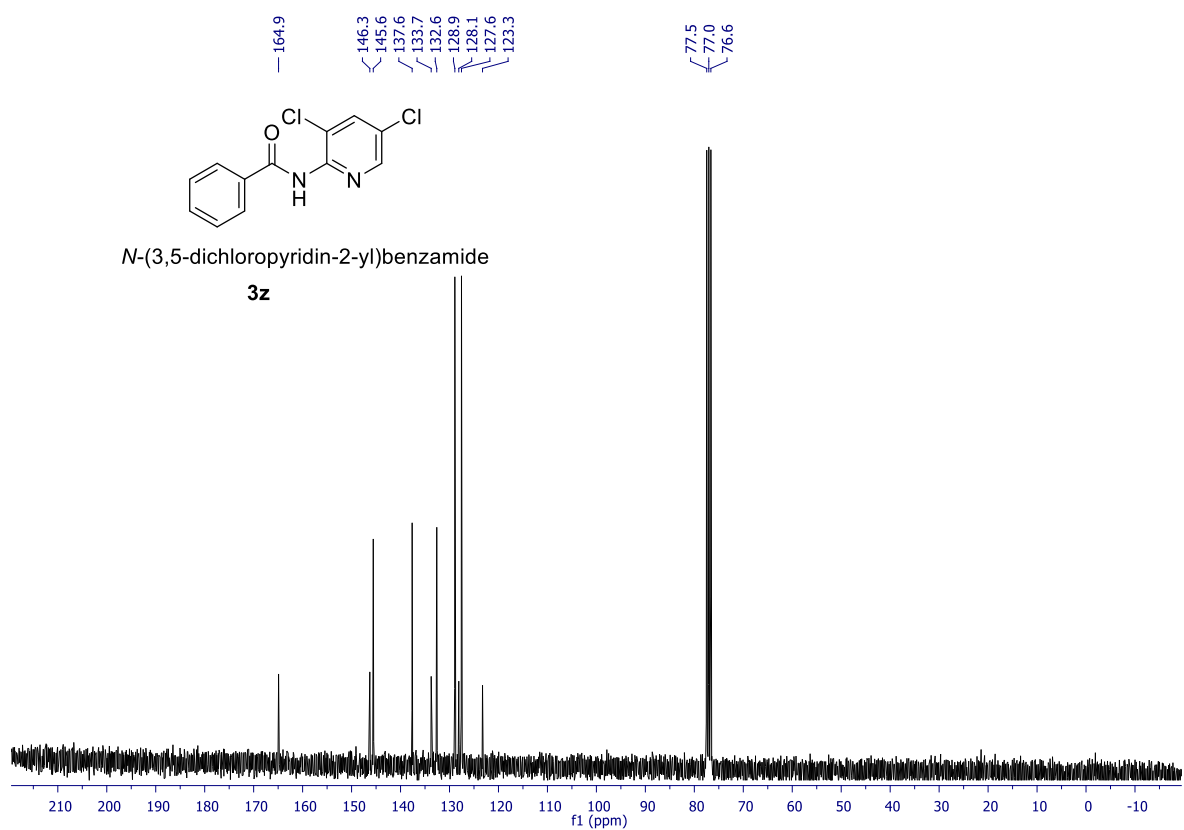

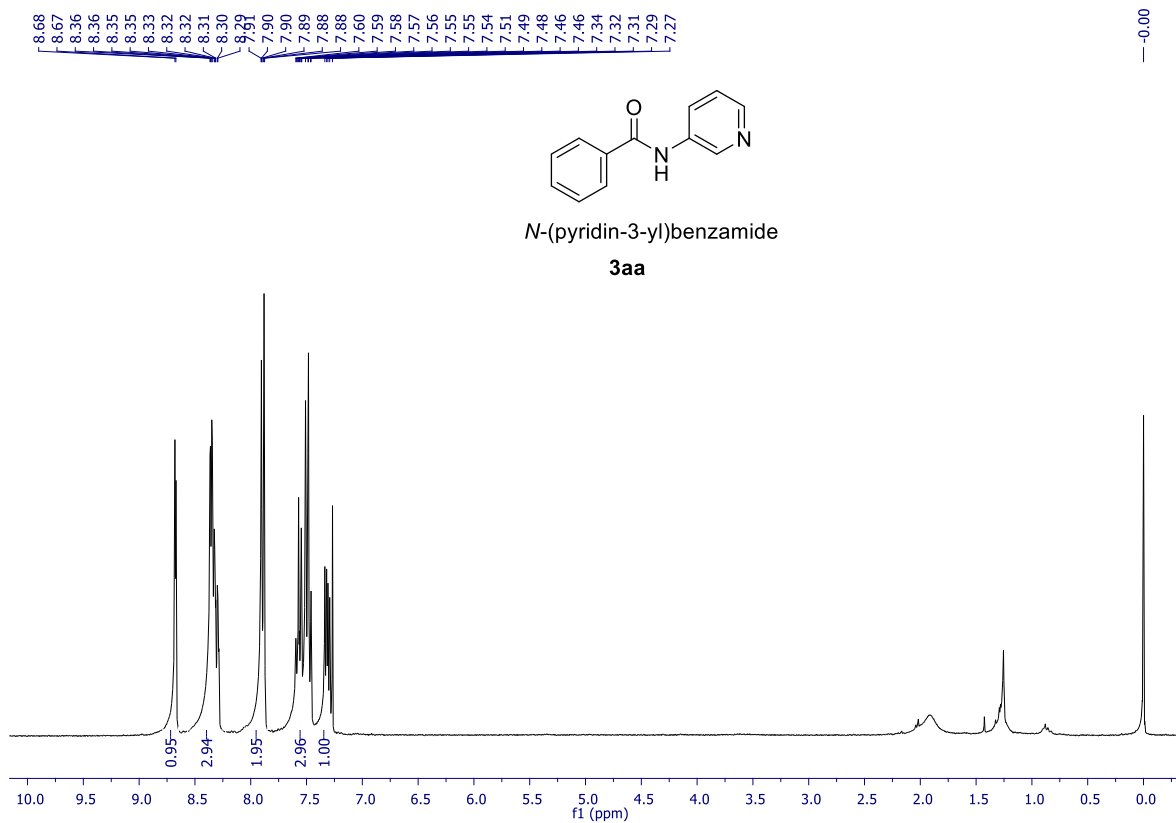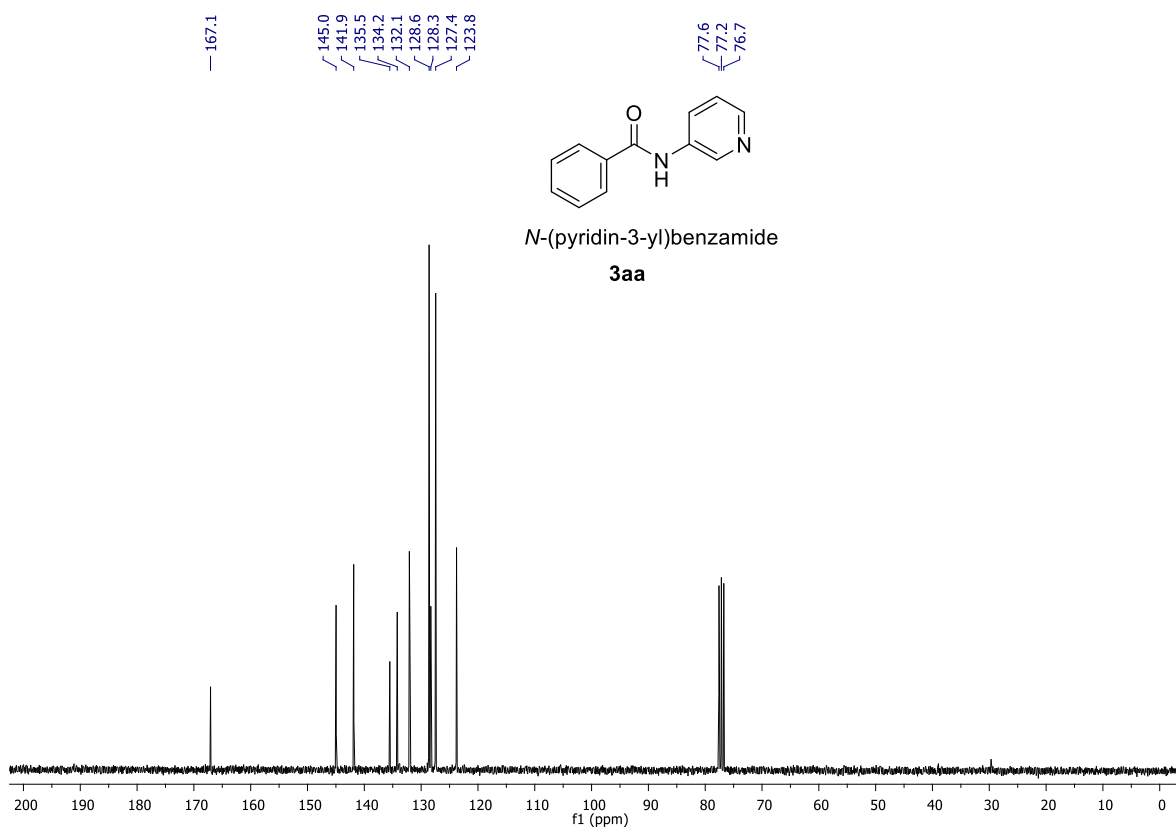

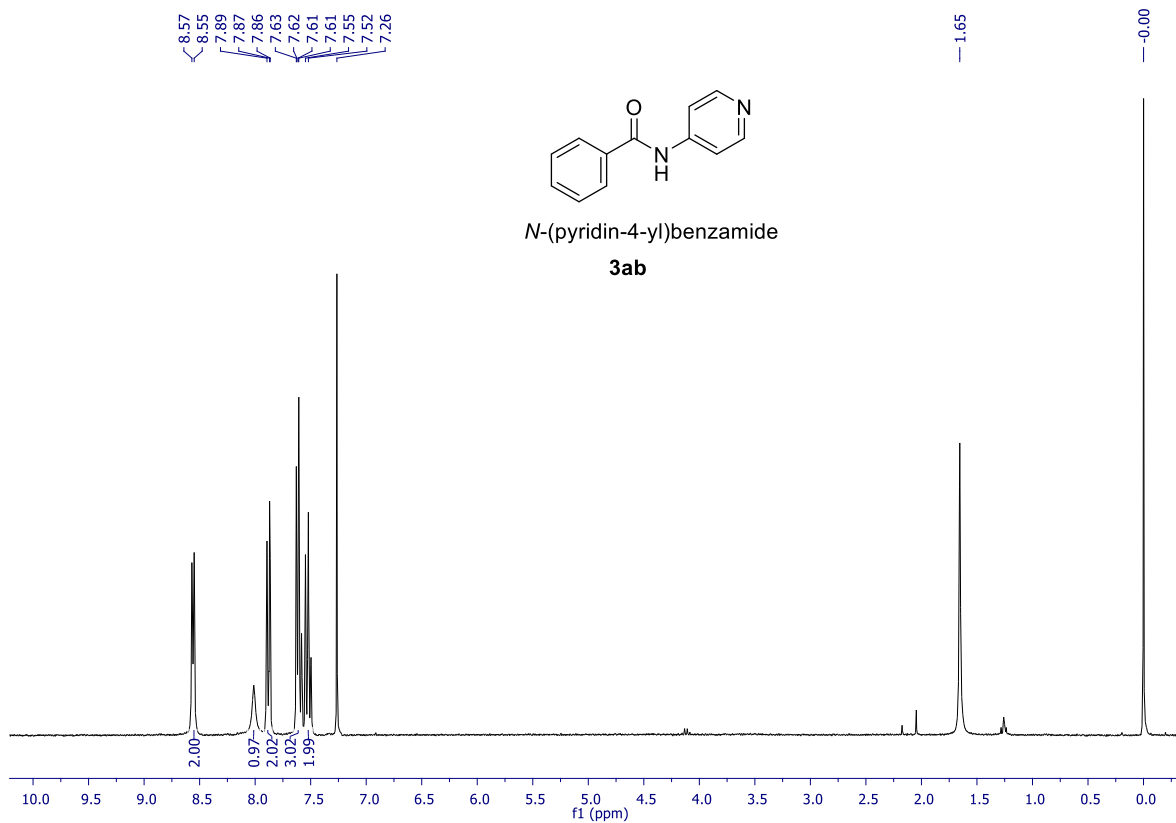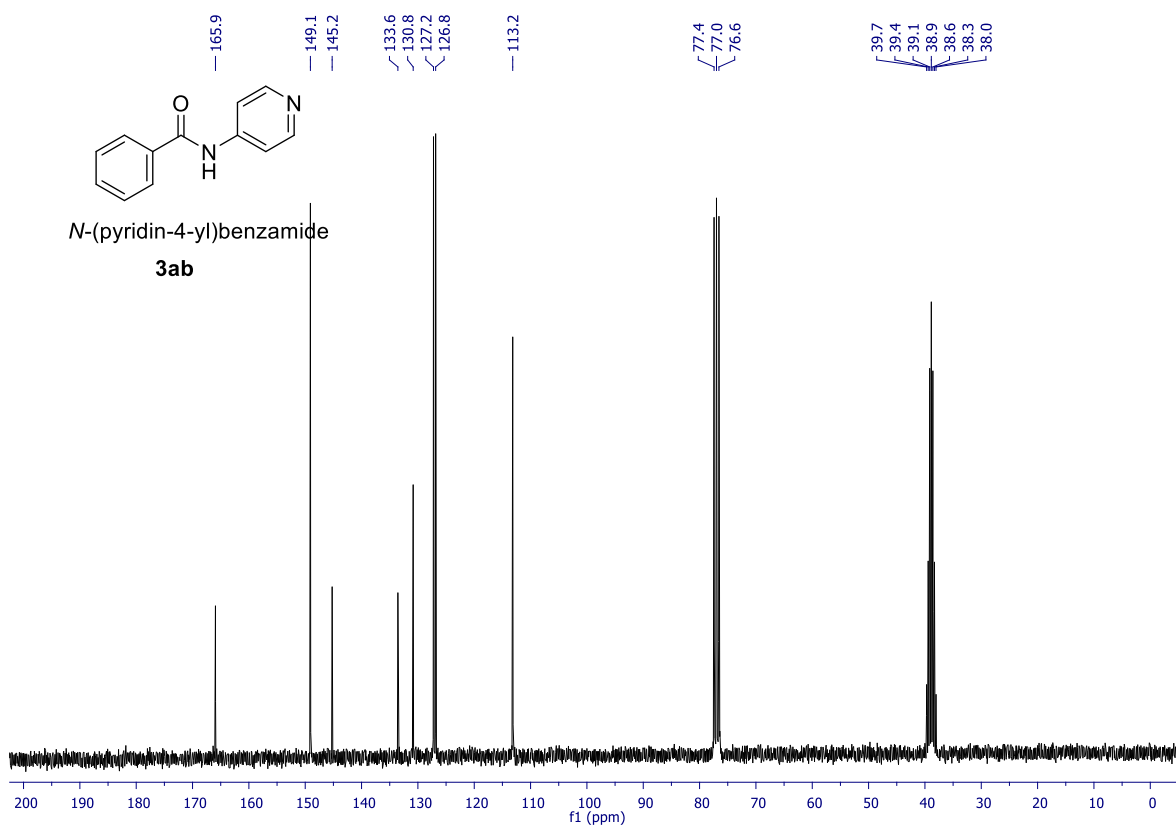

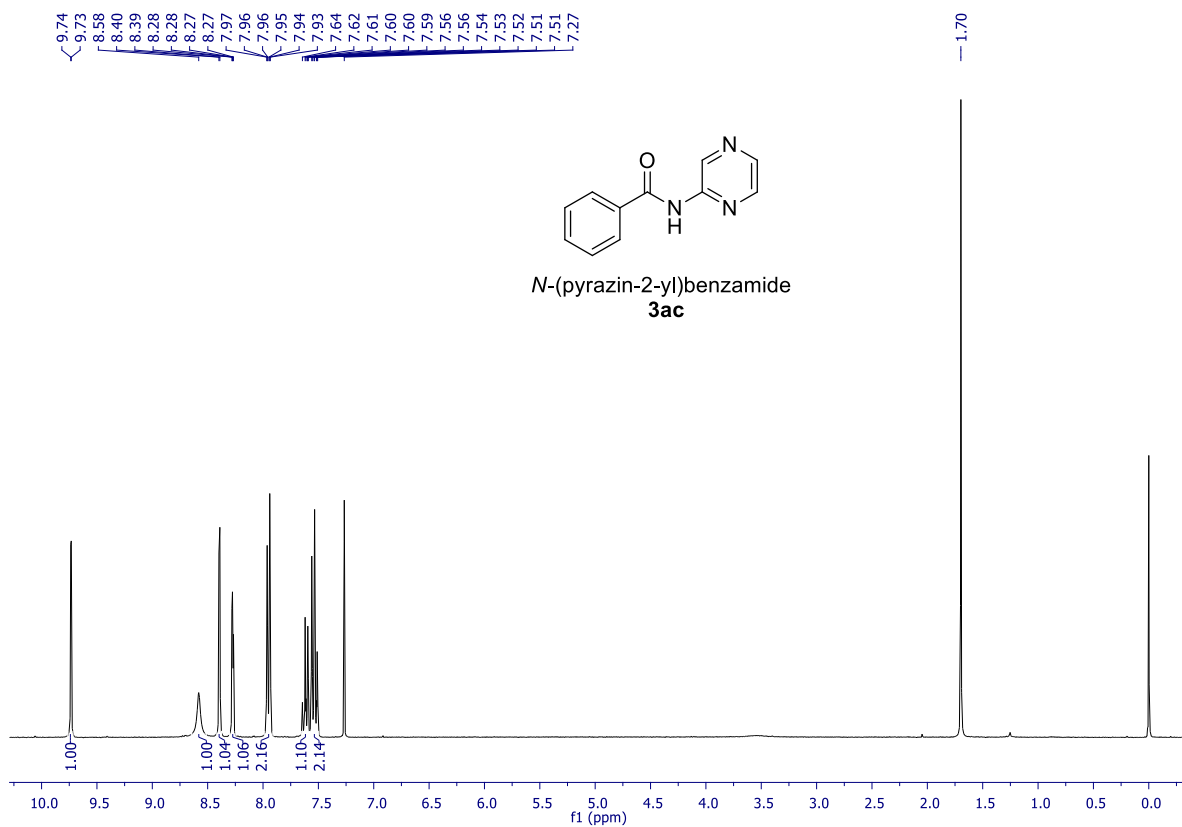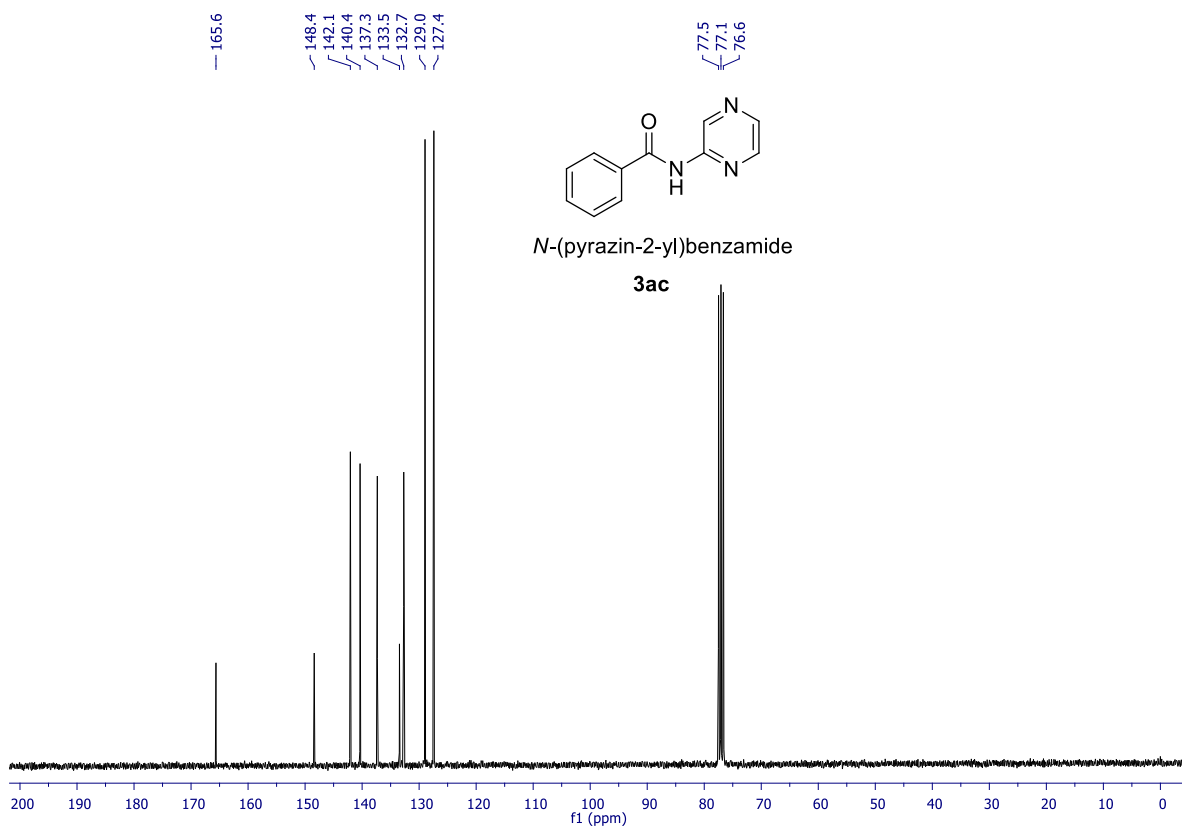

**Reference:**

1. S. Yang, H. Yan, X. Ren, X. Shi, J. Li, Y. Wang, G. Huang, *Tetrahedron* 2013, **69**, 6431.
2. L. Nicolas, P. Angibaud, I. Stansfield, L. Meerpoel, S. Reymond, J. Cossy, *RSC Adv.* 2013, **3**, 18787.
3. K. Wanga, M. Shen, W-H. Sun, *Polyhedron*. 2010, **29**, 564.
4. X. Li, B. Li, J. You, J. Lan, *Org. Biomol. Chem.* 2013, **11**, 1925.
5. D. Rai, R. K Singh, *Ind. J. Chem.* 2011, **50B**, 931.
6. J. L. Vrijdag, F. Delgado, N. Alonso, W. M. D. Borggraeve, N. Pe´rez-Macias, J. Alca´zar, *Chem. Commun.* 2014, **50**, 15094.
7. H. N. Hareesh, K. U. Minchitha, N. Nagaraju, N. Kathyayini, *Chin. J. Catal.* 2015, **36**, 1825.
